# Supplementary material for: LysM Receptor-Like Kinase and LysM Receptor-Like Protein Families: An Update on Phylogeny and Functional Characterization
Source: Front Plant Sci. 2018 Oct 24;9:1531. doi: 10.3389/fpls.2018.01531 (PMC6207691; doi:10.3389/fpls.2018.01531)
Supplement: Supplementary file 2 [file Table_1.xlsx]

## Sheet: Table S1
Table S1:	List of the LysM-RLK/Ps identified in 8 plant species and organized in phylogenetic groups.
	The phylogenetic groups and the nomenclature we propose (Buendia et al) are based on the phylogenetic trees made in this study. Previous nomenclature from Zhang et al is also shown. Footnotes explain the modification made in the sequences obtained from in indicated genome versions. The LYM, LYR and LYK protein sequences are in the corresponding sheets of this file.
	Zhang et al	Buendia et al		Medicago (Mt4)	Alternative name	Nb introns	Lotus (V3.0)	Alternative name	Nb introns	Peach (V2.1)	Alternative name	Nb introns	Arabidopsis (TAIR10)	Alternative name	Nb introns	Brassica rapa (V1.3)	Nb introns	Tomato (ITAG2.3)	Alternative name	Nb introns	Brachypodium (V3.1)	Alternative name	Nb introns	Rice (V7)	Alternative name	Nb introns
LYR	LysM-RLK I	LYRI	A	Medtr5g019040	MtNFP	0	Lj2g3v1828350	LjNFR5	0	Prupe.7G147300	PpLYR1	0						Solyc02g065520	SlLYK10	0	Bradi1g69290	BdLYR1	0	Os03G13080	OsLysM-RLK2 / OsLYK5/OsNFR5	0
										Prupe.7G147400 #
				Medtr8g078300	MtLYR1	0	Lj4g3v0912440	LjLYS11	0
			B	Medtr5G042440	MtLYR8	1	Lj0g3v0102179 + Lj0g3v0124999		1*7	Prupe.1G027000	PpLYR2	1						Solyc09g083210	SlLYK9	1	Bradi3g51790	BdLYR2	1	Os02G45750		1
																		Solyc09g083200 ##	SlLYK8	1
	LysM-RLK IV	LYRII	A	Medtr7g029650	MtLYR10	0	Lj1g3v3834250	LjLYS16	0	Prupe.3G303700	PpLYR6	0	At3g01840	AtLYK2	1 (~400bp)	Brara.E03634	1 (~400bp)	Solyc02g094010	SlLYK2	1 (~700bp)
			B	Medtr4g058570	MtLYR9	0	Lj3g3v3082380	LjLYS15	0	Prupe.6G104800	PpLYR7	0						Solyc11g069630	SlLYK15	0*13
	LysM-RLK II	LYRIII	A	Medtr5g019050	MtLYR3	0	Lj2g3v1828320	LjLYS12	0	Prupe.7G147600	PpLYR3	0*9	At2g23770	AtLYK4	0	Brara.D01416	0	Solyc02g089900	SlLYK4	0	Bradi4g16350	BdLYR4	0	Os11G35330	OsLysM-RLK7 / OsLYK6	0
			B	Medtr1g021845	MtLYR2	0	Lj0g3v0145339		0	Prupe.7G147500	PpLYR4	0						Solyc02g089920	SlLYK7	0
																		Solyc12g089020	SlLYK6	0*12
	LysM-RLK III		C	Medtr5g085790	MtLYR4	0	Lj2g3v2899910	LjLYS13	0				At2g33580	AtLYK5	0	Brara.D02042	0				Bradi3g06770	BdLYR3	0	Os06G41960	OsLysM-RLK6 / OsLYK3	0
				Medtr3g080170	MtLYR7	0	Lj2g3v2899900	LjLYS14	0															Os06G41980	OsLysM-RLK5 / OsLYK2	0
																								Os02G09960	OsLysM-RLK1 / OsLYK4	0
		LYRIV		Medtr7g079350	MtLYR5	1*1	absent in V3.0	LjLYS21	1
				Medtr7g079320	MtLYR6	1	Lj1g3v2808030	LjLYS20	1	Prupe.6G357200	PpLYR5	1
LYK	LysM-RLK VI	LYKI		Medtr5g086540	MtLYK1	10*2	Lj2g3v2904640	LjLYS2	11
				Medtr5g086120	MtLYK4	11*3
				Medtr5g086090	MtLYK5	11*4
				Medtr5g086040	MtLYK6	10	Lj2g3v2904610	LjLYS1	11
				Medtr5g086030	MtLYK7	11*5
				Medtr5g086310 + Medtr5g086330	MtLYK2	11*6
				Medtr5g086130	MtLYK3	11	Lj2g3v2904690	LjNFR1	11									Solyc01g098410	SlLYK13	11
				Medtr3g080050	MtLYK9	12	Lj6g3v1055580	LjLYS6	12	Prupe.3G213100	PpLYK2	11*10						Solyc07g049180	SlLYK1 / SlBti9	11*15
				Medtr2g024290	MtLYK8	11	Lj6g3v1812110	LjLYS7	11	Prupe.4G016100	PpLYK1	11						Solyc02g081050	SlLYK12	11	Bradi3g41590	BdLYK1	11*17	Os08g42580	OsLysM-RLK9 / OsCERK1	11*19
																		Solyc02g081040	SlLYK11	11*14				Os09g33630	OsLysM-RLK10	12*20
													At3g21630	AtLYK1 / AtCERK1	11	Brara.E02055	11
	LysM-RLK V	LYKII		Medtr5g033490	MtLYK10	9	Lj2g3v1415410	LjLYS3 / EPR3	9	Prupe.5G168000	PpLYK3	9						Solyc06g069610	SlLYK14	9	Bradi2g40627	BdLYK2	9*18	Os01G36550	OsLysM-RLK3 / OsLYK1	9*21
										Prupe.1G247900	PpLYK4	9
		LYKIII		Medtr8g014500	MtLYK11	10	Lj3g3v2318170	LjLYS5	10	Prupe.3G058700	PpLYK5	10	At1g51940	AtLYK3	10	Brara.H00193	10*11	Solyc03g121050	SlLYK3	10	Bradi2g49400	BdLYK3	10	Os01G53840	OsLysM-RLK4	10
							Lj3g3v0290100	LjLYS4	10							Brara.F00223	8
	?	?																						Os11g34624	OsLysM-RLK8	6
LYM	LYPIII	LYMI		Medtr3g072410	MtLYM1	4	Lj0g3v0219829	LjLYM1	4*8	Prupe.1G500000	PpLYM1	4	At1g21880	AtLYM1	4	Brara.F01580	4	Solyc11g012870	SlLYM1	4	Bradi3g57756	BdLYM1	4	Os06g10660	OsLYP6	4
																Brara.H02266	2				Bradi1g46200	BdLYM3	4	Os02g53000	OsLYP5	4
													At1g77630	AtLYM3	4	Brara.B02278	3							Os09g27890	OsLYP4	4
										Prupe.5G220900	PpLYM3	4						Solyc03g119550	SlLYM3	4*16
	LYPI	LYMII		Medtr4g094730	MtLYM2	3	Lj4g3v0200090	LjLYM2	3	Prupe.8G176700	PpLYM2	3	At2g17120	AtLYM2	3	Brara.G00290	3	Solyc01g112080	SlLYM2	3	Bradi1g76177	BdLYM2	3	Os03g04110	OsCEBiP	3
																					Bradi4g37090	BdLYM4	3	Os09g37600	OsLYP3	3
	Total number			24			21			16			8			10		17			11			16		123
		# :	truncated gene: coding protein without extracellular region
		## :	truncated gene: coding protein without intracellular region
		underlined :	genes absent in previous phylogenetic analyses
		Italic :	genes not used in our phygenetic analysis
		* :	prediction or sequence has been corrected
			1	Last exon has been skipped according to the gene structure in other plant species and to symbimics data
			2	One short exon has been added according to the gene structure in other plant species and to symbimics data
			3	One short exon has been added according to the gene structure in other plant species and to symbimics data
			4	One short exon has been added according to the gene structure in other plant species and to symbimics data
			5	Start codon has moved according to the protein sequences in other plant species
			6	The mRNA is annotated as two genes separated . Medtr5g086310 covers exon 1-6 and Medtr5g086330 covers 6-12
			7	The mRNA can be found in two separated genes. Lj0g3v0102179 corresponds to exon 1 and Lj0g3v0124999 corresponds to exon 2
			8	First short exon has been skipped according to the gene structure in other plant species
			9	First short exon has been skipped according to the gene structure in other plant species
			10	First short exon has been skipped. One short exon has been added and two intron borders have been moved according to the gene structure and protein sequences in other plant species
			11	Start codon has moved according to the protein sequences in other plant species
			12	A premature stop codon has been modified according to genomic sequences from other cultivars
			13	Last exon has been skipped according to the gene structure in other plant species
			14	Two exons have been added at the beginning of the gene according to the gene structure in other plant species
			15	First exon has been skipped according to the gene structure in other plant species
			16	Nucleotide A320 (from ATG) has been deleted accordingly to the sequence in Solanum tuberosum
			17	Two intron have been added and one intron border has been modified according to the gene structure and protein sequences in other plant species
			18	Start codon has moved according to the protein sequences in other plant species
			19	Two exons have been added at the beginning of the gene according to shimizu et al., 2010
			20	Five exons have been added at the beginning of the gene according to the gene structure and protein sequence in other plant species
			21	One exon has been added according to the gene structure in other plant species

## Sheet: Seq LYK
ID	AA number	Seq
Medtr5g086540	590	MKPIKFILSLLLMLLASSSAESKCSKTCDLALASYYIWEGTNLTYISNIMQSNVVSKPLDIFSYNTDTLPNLDMLRFSSRLNVPFPCDCINDEFLGHTFLYEFHPRETYASIAELTFSNLTNKEWMEKVNVPDSVKVNVTVNCSCGDKMVSKDYGLFITYPLSSEDTLESIAKHTKVKPELLQKYTPGVNFSKGSGLVFIPGKDKNGVYVPLPHGKAGHLARSLATAVGGTCTVLLLAISIYAIYFRNKNAKESKLPSKYIVVDKSPKFSYEELANATDKFSLANKIGQGGFGEVYYGEPRGKKTAIKKMKMQATREFLAELKILTRVHHCNLVHLIGYCVEGSLFLVYEYIDNGNLSQNLHDSERGPMTWSTRMQIALDVARGLEYIHEHSVPVYIHR…
Medtr5g086310	612	MKLKNGLLLFFMFLECVFSKVESKCVKGCDVALASYHVMLPFTYQNITSFMQSKIVSVSSLSDVIISYNKGKVSKNGNLFAFSRVNIPFPCECIGGDFLGHVFEYSAKEGDTYDLIANSYYASLTTVELLKKFNSYDQDHIPAKAKVNVTVNCSCGNSQISKDYGLFITYPLRTDDTLQKIANQSNLDEGLIQSYNSGVNFSNGSGIVFIPGRDQNGDYVPLYPRSGLAKGATVGIIIAGIFGLLLLVIYIYVRYFKKKEEEKTKLAEALSTQDGSAEYETSGSSVHATVFTGIMVAKSTEFSYQELAKATNNFSLDNKIGQGGFGAVYYAELRGEKTAIKKMDVQASSEFLCELKVLTHVHHLNLVRLIGYCVEGSLFLVYEHIDNGNLGQYLHGTGK…
Medtr5g086130	620	MNLKNGLLLFILFLDCVFFKVESKCVKGCDVALASYYIIPSIQLRNISNFMQSKIVLTNSFDVIMSYNRDVVFDKSGLISYTRINVPFPCECIGGEFLGHVFEYTTKEGDDYDLIANTYYASLTTVELLKKFNSYDPNHIPVKAKINVTVICSCGNSQISKDYGLFVTYPLRSDDTLAKIATKAGLDEGLIQNFNQDANFSIGSGIVFIPGRDQNGHFFPLYSRTGIAKGSAVGIAMAGIFGLLLFVIYIYAKYFQKKEEEKTKLPQTSRAFSTQDASGSAEYETSGSSGHATGSAAGLTGIMVAKSTEFTYQELAKATNNFSLDNKIGQGGFGAVYYAELRGEKTAIKKMDVQASSEFLCELKVLTHVHHLNLVRLIGYCVEGSLFLVYEHIDNGNLG…
Medtr5g086120	624	MNLKNGLLLFILFLDCVFFKVETKCVKGCDVALASYYIMPSIQLINVSNFIQSKIVLTNSFDVIMSYNRVVVFDKSGLISYTRINVPFPCECIGGEFLGHVFEYTTKEGDDYDLIANTYYASLTTVELLKKFNSYDPNHIPVKAKINVTVICSCGNSQISKDFGLFVTYPLRSDDTLAKIATKADLDEGLLQNFNQDANFSKGSGIVFIPGRDENGVYVPLPSRKAGHLARSLVAAGICIRGVCMVLLLAICIYVRYFRKKNGEESKLPPEDSMSPSTKDGDKDSYSDTRSKYILVDKSPKFSYKVLANATENFSLAKKIGQGGFGEVYYGVLGGKKVAIKKMKTQATREFLSELKVLTSVRHLNLVHLIGYCVEGFLFLVYEYMENGNLSQHLHNSEK…
Medtr5g086090	625	MEQPLKFRLSLLFLLLVLQSITSESKCSKTCDLALASYYIRPGTTLANISKVMQSNVVSKEEDILSYNTAITNIDAIQSDTRVNVPFPCDCINDEFLGHTFLYKLRLGDIYPSIAERTYTNLTTEEWMERVNSYPGTDLPVSAMVNVTVNCSCGSREVSKDYGLFITYPLSSKDTLESISKDTMIEAELLQRYNPGVNFSQGSGLVFIPGKDENGFYVPLPPRKGHLARSLGTAGISIGGLCMVLLLLLCIYVRYFRMKNGEEKSKLSPDDSMTPSTKDVDKDTNGDTGSRYIWLDKSPEFSYEELANATDNFSLAKKIGQGGFGEVYYGELRGQKIAIKKMKMQATREFLSELKVLTSVHHRNLVHLIGYCVEGFLFLVYEYMENGNLNQHLHNSEKE…
Medtr5g086040	590	MKISFSFIVLILLIASTESKCNEGCSLALASYTLNHVSNLTYISNIMKSNVLSKPQDIIINNDKNKRANVPFPCNCINGEFLAYTFLYELQPGETYTSVAEESFSNLTTDVWMQNFNVYRPTNIPDFAMIKVTVNCSCGNKEVSMDYGLFITYPLRSEDTLESIAKGAEIEAELLQRYNPGVNFSKGSGLVFIPGKDQNGSYLPLHPSTVGLGTVAITGISVGVLAALLLLLFFVYIKYYLKKKNKKTWEKNLILDDSKMKSAQIGTNIASIMVEKSEEFSYKELSIATNNFSMANKIGEGGFGEVFYAELRGQKAAIKKMKMKASKEFCAELKVLTLVHHLNLVGLIGYCVEGFLFLVYEYIDNGNLSQNLHDSEREPLSWSTRMQIALDSARGLEYI…
Medtr5g086030	620	MKPIKFRLSFLFMLLASKSFIAESKCSKTCNIALASYYLQDDTNLTYVSNIMQSNLVTKPEDIVSYNTDTITNKDFVQSFTRVNVPFPCDCIHDEFLGHIFQYQVATKDTYLSVASNNYSNLTTSEWLQNFNSYPSNDIPDTGTLNVTVNCSCGNSDVSKDYGLFITYPLRPEDSLELISNKTEIDAELLQKYNPGVNFSQGSGLVYIPGKDQNRNYVPFHISTGGLSGGVITGISVGAVAGLILLSFCIYVTYYRKKKIRKQEFLSEESSAIFGQVKNDEVSGNATYGTSDSASPANMIGIRVEKSGEFSYEELANATNNFNMANKIGQGGFGEVYYAELNGEKAAIKKMDMKATKEFLAELKVLTRVHHVNLVRLIGYCVEGSLFLVYEYIDNGNLG…
Medtr2g024290	616	MITNQIFILNFLLFVLLIMKTVRSCNSGCDLALASYYIEEGTNLTYISNLFNQPTSEILKYNPNIQNPDTIQSHTRLNIPFTCDCLSGLFLGHTFSYKLKEGENYKAVANGYYSNLTTIDFLIRVNSYPATDIPAGTVINVTVNCSCGDRDVSKDYGLFLTYPLRNGDSLPGIAMESGVPVELVKRYNPASNFRAGELVFLPAKDENGNFPPLKMGSGMSKGGIVGIVVGGAFGILLLVLILYVVFYRRKKVADQVTLLPVPGASELDQSSQLQHGRGSSMDKTSESTTVVSPRLTGITVDKSVEFSYEELAKATDGFSTANIIGRGGFGLVYYAELRNEKAAIKKMDMQASKEFLAELKVLTHVHHLNLVRLIGYCVEGSLFLVYEYIENGNLSQHLR…
Medtr3g080050	621	MEHQPRFTSFISLPLFSIFLASIPFITESKCTKGCSLALANFYVSQGSNLTYISSIMRSNIQTRPEDIVEYSREIIPSKDSVQAGQRLNVPFPCDCIDGQFLGHKFSYDVETGDTYETVATNNYANLTNVEWLRRFNTYPPNDIPDTGTLNVTVNCSCGDADVGNYALFVTYPLRPGETLVSVANSSKVDSSLLQRYNPGVNFNQGSGIVFVPGKDQNGSFVFLGSSSGLGGGAIGGIAVGIVVVLLLVAAAIYFGYFRKKKIQKEELFSRDSTALFSQDGKDENSHGAANVTQRPGVMTGITVDKSVEFSYDELAAASDNFSMANKIGQGGFGSVYYAELRGEKAAIKKMDMQATKEFLAELKVLTRVHHLNLVRLIGYSIEGSLFLVYEYIENGNLS…
Medtr5g033490	613	MASLIQLLSIFLPLLASSLPTIFSIEVSMKKAYMEPYKCSTKMRTCNASLYHINYNHNIEQIANFYSIDPSQIKPIIRSTKQDYLVKVPCSCKNIKDLSGYFYETTYKVSPNETSVDIMNLIYSGQAWQVNEDLVANENVTIHIPCGCSEFESQIVVTYTVQQSDTPTSISLLLNATIDGMVRINQILGPNPTFIDIGWVLYVPKELKGSPLYHGKEKKHKWVIIIGILVSVTLLSVITLIIFILRRNKAYETSKYDPKTVSKRSFGNRTISLRNHEFHKEYMEDATQFDSERPVIYDFEEIEHATNNFDETRRIGVGGYGTVYFGMLEEKEVAVKKMKSNKSKEFYAELKALCKIHHINIVELLGYASGDDHLYLVYEYVPNGSLSEHLHDPLLKGHQ…
Medtr8g014500	667	MILVGKPHLKLLQFVLFLFYLNFNRSSSNQMAPMNCTDTRRVCTSFLAYKPQQNQSLGVIQSMFDVLPSDITVEGNGWDYIFIRKNCSCASGIKKYVSNTTFTVKTNEGFVDDLVMDAYDGLILLPNTSRKARNGAVISLRLFCGCSSGLWNYLLSYVLRDGDSVESLASRFGVSMDSIEGVNGLDGPDNVTVGSLYYIPLDSVPGDPYPLKNASPPASVPTPSVDNISGDQDNHKYHVPYGWIIGGLGVGLILIILGIILCVCLRSSNCFSDSRSHEKDAEGKVSHKFQILRNPSFFCGSGRYICGKHVDQKQTDGDSSTHTITVPKASTLGPDVFDMDKPVVFAYEEIFSSTEGFSDSNLLGHGTYGSVYYCLLRDQEVAIKRMTATKTKEFTSEIK…
Lj2g3v2904610	600	MEPKLTFSLSFLLTLLSPFAESKCIKGCDLALASYYQWSGSNLTYISKIMESQILSKPQDIVTYNKGKRNFGVFSTRVNVPFPCDCINGEFLGHTFEYQLQPEETYTTVASETFSNLTVDVWMQGFNIYPPTNIPDFAVLNVTVNCSCGNSEVSKDYGLFITYPLRIEDSLQSIAEEMKLEAELLQRYNPGVNFSQGSGLVFIPGKDQNGSYVPFQQSTVGFSGGVIAGISVGVLVGLLLVAFCVYTKHLQKKKALEKKLILDDSTVNSAQVSNDSGGIMMDKSREFSYKELADATNNFSVANRIGEGGFGTVYYADLSGEKTAIKKMNMLASREFLAEVKVLANVHHLNLVRLIGYCIEGSLFLVYEYIDNGNLKQSLHDLEREPLPWSTRVQIALDS…
Lj2g3v2904640	630	MDLKSRLTFFFLLSWACISFSVVESMCISGCDLALASYYIWIGSNLTYISNIMESRVLSEPEDIINYNQDHVRNPDVLQVHTRVNVPFPCDCINGEFLGHIFLHEFHEGDTYPSVAGTVFSNLTTDAWLQSTNIYGPTSIPVLAKVDVTVNCSCGDIKVSKDYGLFITYPLRAEDTLESIAEEAKLQPHLLQRYNPGVDFSRGNGLVFIPGKDENGVYVPLHIRKAGLARVVAGVSIGGTCGLLLFALCIYMRYFRKKEGEEAKFPPKESMEPSIQDDSKIHPAANGSAGFKYIMMDRSSEFSYEELANATNDFNLANKIGQGGFGEVYYAELRGEKVAIKKMKIQASREFLAELKVLTSVHHLNLVRLIGYCVERSLFLVYEYMDNGNLSQHLRESER…
Lj2g3v1415410	620	MFYDFTTMASLTHPLCVLLTLMAAASFASVFSLEVSSKTTYMEPFNCSTKIRTCNSLLYHISIGLKVEEIARFYSVNLSRIKPITRGTKQDYLVSVPCTCRNTNGLNGYFYHTSYKVKVNDSFVDIQNLFYSGQAWPVNEDLVVPNETMTIHIPCGCSESGSQIVVTYTVQRNDTPLSIALLLNATVEGMVSVNSVMAPNPTFIDVGWVLYVPKELNPISHGKENKHKLEKIIGILAGVILLSIITLIILIVRRNRSYETCKDDPRAISKRSIGKRTSSLMNRDFHKEYMEDATSFDSERPVIYTLEEIEQATNDFDETRRIGVGGYGTVYFGVLGEKEVAIKKMKSNKSKEFYAELKALCKIHHINIVELLGYASGDDHLYLVYEYVPNGSLSEHLHD…
Lj3g3v0290100	635	MYLTQKPCLKLLLHFPIFLLHFYSIYSYPTPMNCTDSTRVCTSFLAFKPQPNQTLAVIESMFDVLPGDITVEGNGWGYTFIRKNCSCAAGIKKYVSNTTFTVKSHGGFVTDMVMDAYDGLVFLPNTTTRWAREGSVVPLSLFCGCSSGLWNYLVSYVIRDGDSVESLASRFGVSMDSIETVNGISNPDSVIVGSLYYIPLNSVPGEPYHLKNDTSPVPVPSPSVDNFSADDINRKAHVPYGLIMGVEARNQAKVAEGNISHKLHRSPILFCGPGRFICCKPVDQTDGESSSDQITAPKPSTLMPEVFNMDKPVVFTYEEIFSSTDGFSDSNLLGYKTYGSVYYGLLRDQEVAIKRITATKTKEFMSEMKVLCKVHHANLVEFIGYAPSHDEVFLVFEYA…
Lj3g3v2318170	665	MIPLAKPQWKFLLLFLVFIHFKRTSSYPMEPMNCTDTSRVCTSFMAFKPQPKQTLAEIQSMFDVLPGDITVEGNGWDYMFIRKNCSCAAGIKKYVSNTTFTVKSNEGWVYDLVMDAYDGLVILPNTTRRARNGAVISLRLFCGCSSGLWNYLMSYVMTDGDSVESLASRFGVSMGSIESVNGIGDPDNVTVGSLYYIPMNSVPGDPYPLKNASPPAPVPTPSVDNFSGDQVDHKAHVPYGWIIGGLGVGLFLIILSVMLCVCMRSSSCFGEARSHEKDADGKISHKFHILRNPSFFCGSGRYICGKHVGQKQKDGESSNHTITIPKASTLGPDIFDMDKPVVFTYDEIFPSTDGFSDSNLLGHGTYGSVYYCLLRDQEVAIKRMTATKTKEFMAEIKVL…
Lj6g3v1055580	622	MEHPRLGFPITLLLFSFILLPSTSQSKCTHGCALAQASYYLLNGSNLTYISEIMQSSLLTKPEDIVSYNQDTIASKDSVQAGQRINVPFPCDCIEGEFLGHTFQYDVQKGDRYDTIAGTNYANLTTVEWLRRFNSYPPDNIPDTGTLNVTVNCSCGDSGVGDYGLFVTYPLRPGETLGSVASNVKLDSALLQKYNPNVNFNQGSGIVYIPAKDQNGSYVLLGSSSGGLAGGAIAGIAAGVAVCLLLLAGFIYVGYFRKKRIQKEELLSQETRAIFPQDGKDENPRSTVNETPGPGGPAAMAGITVDKSVEFSYDELATATDNFSLANKIGQGGFGSVYYAELRGERAAIKKMDMQASKEFLAELKVLTRVHHLNLVRLIGYSIEGSLFLVYEFIENGNL…
Lj6g3v1812110	621	MTTKPNRAFFLIYFLFLLLIIIKAQGSCVSGCNLALASYTIWQGANLTYISKLFGKEPSEIMKYNPNVKNPDVIQSETQINVPFSCECLDGIFQGHTFSYTMQAGNTYKSIAKVDFSNLTTEEWVTRVNRYKPNDIPIGVKINVTINCSCGDERVSKGYGLFLTYPLRPGDDLPRLAVESGVSAEVLQGYNAGADFSAGNGLVFLPAKDENGNFPPLQKLGRSGISPGAIAGIVVGGAVVILLLAFASYVGLNRRTKVDEVSLLPVPGSYEDHNSQQLHHGCGSSMYKASESSTVVSPRLTGITVDKSVEFPYEELAKATDSFSNANIIGRGGFGSVYYAELRNEKAAIKKMDMQASNEFLAELKVLTHVHHLNLVRLIGYCVEGSLFLVYEYIENGNL…
Lj2g3v2904690	621	MKLKTGLLLFFILLLGHVCFHVESNCLKGCDLALASYYILPGVFILQNITTFMQSEIVSSNDAITSYNKDKILNDINIQSFQRLNIPFPCDCIGGEFLGHVFEYSASKGDTYETIANLYYANLTTVDLLKRFNSYDPKNIPVNAKVNVTVNCSCGNSQVSKDYGLFITYPIRPGDTLQDIANQSSLDAGLIQSFNPSVNFSKDSGIAFIPGRYKNGVYVPLYHRTAGLASGAAVGISIAGTFVLLLLAFCMYVRYQKKEEEKAKLPTDISMALSTQDASSSAEYETSGSSGPGTASATGLTSIMVAKSMEFSYQELAKATNNFSLDNKIGQGGFGAVYYAELRGKKTAIKKMDVQASTEFLCELKVLTHVHHLNLVRLIGYCVEGSLFLVYEHIDNGNL…
Prupe.4G016100	620	MIILAEGNIHIKFLAFHVFLLLSVKAKAKCKTGCNFALASYHVWEGANLTYISNIFGQQVPEILQYNRQVLRDYNGTRIKVPFSCDCLNGDFLGHTFTYITQHGDTYNTIAENAFANLTTVEWLSRVNVYAPTQIPDQVPINVTVNCSCGNRHVSKDYGLFETYPLRPGEDLSFVAVETGVPAGLLVTYNRGSDFSSGNGLVFVPARDQNGSFPPLKLRAGGISGGAIAGICVAGVSAALILALLLYAWHYKRKAVEAPFLSAASEDRYIQHVHVSGHSSEKTLELVALVGASSPGLTGITVDKSVEFSYEELAKATSDFNIANKIGQGGFGAVYYAELRGEKAAIKRMDMQASKEFLAELKVLTHVHHLNLVRLIGYCVEDSLFLVYEYIENGNLSQH…
Prupe.3G213100	609	MRFRIGLGFLVLLSLCFTVKSQCSKSCGWALAKYYVWSGSNLTLISHLMETDEDTIVNYNNGTVPNKDSVLAGTKINIPFKCECVNGKFLGHMFEYDVNSGDTYNKVAQTYYANLTTVEALTWFNSYPPTNIPNANAKLNVSVNCSCGNKAVSKDYGLFITYPLQPGDTLASIAQAEQLNQTLLQRYNPGVNFSQGSGFVYIPGKDDKGSYRSLKSSPAGVAIAGIIVAVIAGALILGGGAYGYYRKNKVDATLLLAASDDQSSQNGLCMLPTPLLPEEANGAGRGPTGISVDKSVEFSFEELSRATDNFSLANKIGQGGFGAVYYAELRGEKAAIKKMDMQASKEFLAELNVLTRVHHLNLVRLIGYCVEGSLFLVYEYIENGNLSQHLRGGSGRDPL…
Prupe.5G168000	621	MEMACLNQKQHLLFLVLFTTIFSTHVLSDSVGISSTRLYPFACSDSDQIQSCNSYLYHISKGHQIEEIATFYSVNSSSIKPIVHGTQHKQDYLVSVPCTCKDIKGTKTYLYDTSYLVKQGDTLENVVSEFYSGQAMIVGAEEKPFAGVGNMTTILLVCGCVERSSQEVVTYTVQDHDTLIGIEQLLSAYESEIQNLNINLTQTPNFIDVGWVLFVPMELNGLQPKRQGKRLSLPTIIGVVSAVGFLFVATFIIFLLIRYRKGRNREEDQKSVVNPSAKKGFSLKQQFFKRQMEETFENERPVIYSMEQIEMATSNFDETRKIGEGGYGSVYFGILGELEVAIKKMRSSRTKEFFAELKVLCKIHHNNVVELLGYASGSDHLCLVYEFLQNGSLNDHLHD…
Prupe.1G247900	618	MASLHHLPCLLLSLWLTQFPAGFASDASIKATFINPLSCSAKIMTCNASLYHINISLNKEQIASFYSVFPSEVNPIKHNSKQDYLISVPCSCKNISGTVGYFYDTTYKVKPSDTFYDVSNQIYSGQPLSVKEELPKFVPEANFPIHLPCGCVESDSQIVVTYTVQEHDTLSDIGILLSAKIDNIENMNKNMTENPSFIVVGWVLFVPMEKNGLKTSKTGIRPKWIILIGIILAVTLLSICTLILLLYRRRTPEKKVEVPNKSVSRSSKSLAAHRSFSLHNQLLHKENMEDGPVFESDGPVIFGVEQIEEATGYFDETRKIGEGGYGSVYFGVIGEKEIAVKKMKSNSTKEFFAELKVLCKIHHINVVELLGYASGDDHLYLVYEYVQNGSLSEHLHDPL…
Prupe.3G058700	660	MKLEWTPMPILLYLILLPISFSTAYSPAPMNCTDTTRLCTSFLAFKPEANETLSVIQSMFDVLPEDVTVEGGDGRGYVFIKKNCSCADGIKKYLTNTTFTVKSGDGYVYDMVMEAYGGLTFLPNTTRRARYGAVVSLRLLCGCSSGLWNYLMSYVMRDGDSIESLASRFGVSMDSIEKVNGIDDPDNVTVGAVYYIPLNSVPGEPYPLESIPLAPVPSPPIDSSSANQVDHKAHVPYLWIVGSLGIILVVIVLGILLYVCLRSSKCLTEERRGHSKDPDGQIRFHILGKPSFCCGSGRYMCCTSADWKQTNGDSNNQQITIPKALGSHVLDMEKPVVFTYEEISSSADGFSDSRLLGHGTYGSVYYGLLREQEVAIKRMTATKTKEFLAEIKVLCKVHH…
AT3G21630	617	MKLKISLIAPILLLFSFFFAVESKCRTSCPLALASYYLENGTTLSVINQNLNSSIAPYDQINFDPILRYNSNIKDKDRIQMGSRVLVPFPCECQPGDFLGHNFSYSVRQEDTYERVAISNYANLTTMESLQARNPFPATNIPLSATLNVLVNCSCGDESVSKDFGLFVTYPLRPEDSLSSIARSSGVSADILQRYNPGVNFNSGNGIVYVPGRDPNGAFPPFKSSKQDGVGAGVIAGIVIGVIVALLLILFIVYYAYRKNKSKGDSFSSSIPLSTKADHASSTSLQSGGLGGAGVSPGIAAISVDKSVEFSLEELAKATDNFNLSFKIGQGGFGAVYYAELRGEKAAIKKMDMEASKQFLAELKVLTRVHHVNLVRLIGYCVEGSLFLVYEYVENGNLG…
AT1G51940	651	MNLTFYIFFLSLLPSFSSSKPMNCSDTTRLCSSFLAFKPNQNQSFSVIQSMFDVLPQDITADISGGYFFIKKNCSCLTTTHQYTTNTTFTIRQNVGYVYNVTVSAYSGLAFPPNTTRAARAGAVVSVQLLCGCSSGLWNYLMSYVAMAGDSVQSLSSRFGVSMDRIEDVNGILNLDNITAGDLLYIPLDSVPGEPYETSKINPPAPSPAPASSLANGNISDDQVNHTAKSGSHVPYIWIVGGLGVVLALLVLCILVCICLRSSSCSSSEEDGNGHNFQILRKSGFFCGSGRYNCCRSGDFRQTNGETQVVAIPKALGDGMFEIEKPMVFTYEEIRAATDEFSDSNLLGHGNYGSVYFGLLREQEVAVKRMTATKTKEFAAEMKVLCKVHHSNLVELIGY…
Brara.E02055	616	MELRIQIATLLLLLFWPSSLFFTVESKCSGSCNLALASYFLENGTTLSNINQNLNSPEAPYDQINFEPILRYNPSITNKDLIQMGTRLLVPFPCECQPGDFLAHVFTYSVQPEDTYDIVATEHYANLTTEDSLRRTNTFPATNIPPSATLNVSVNCFCGNESVSKDYGLFVTYPLRPEDSLDAIASSSGVPAETLQRYNPGVDFRSGSGIVFVPGKDPNGTFPPFKSSDKGGLGAGVIAGICVGVLVALLLISFVIYYVYRKNKKQESHSSSIPLSAKVDQASLQSGDLVGTGVAPGLAAISVDKSVEFTLEELAKATDNFNLSFKIGQGGFGAVYYAELRGEKAAIKKMDMEASKQFLAELKVLTRVHHVNLVRLIGYCVEGSLFLIYEYVENGNLGQ…
Brara.H00193	665	MNLSASSFLILLSFFFILPNLSSSKPMNCTDTSRLCTSFLAFRPNPNQTFSIIQSMFDALPSDITADSTGEDDGGGYIYVKKNCSCLTTTPHQYATNTTFTIRQNRGYVYDAVVSAYSGLALPPNTTRASSAGAVVSVQLLCGCSSGLWNYLMSYVTVSGDSVQSLSSRFGVSMDRIEQVNGISNPDNVTTGDLIFIPLDSVPGVPYEARKINPPAPSPSPVLTNSNISATDEVNHTSKGGHVPYIWIVGGLTVVLALLVMCILVCICLRSSSCGSSDEDGNEHNFQILRKSSFFCGSSRYNCCGSGDFRPTNGEETQSHHQAVAIPKALGDGVFEIEKPMVFTYEEICAATDGFSDSNLLGHGNYGSVYFGLLREQEVAVKRMTATKTKEFAAEMKVL…
Brara.F00223	657	MTLATSTFWVLSFFTLWNLSSSEPMNCSDTSRLCTSFLAFKPNQNQTFSIIQSMFDALPSDITADAASGDVYVRKNCSCLTTTPHQYATNTTFTIRQNRSSVSDAVVSDYSGLAFPLNSTREARPGAVVSVQLLCGCSSGLWNYLMSYVTVKGDSVQSLSSRFDVSMDRIEEVNGISSPDNITTGDLIYIPLDSVPGVPYETKKINPPAPSPALTNINISAADQVNHTSKDGGHVPYIWIVGGLTVVLALLVICILVCICLRSSSCSSSDEDSGGGHSFQILRKAGFFCGSGRYNCCRSGDFRQTNCETQSNLQVVAIPKALGDGMFEIEKPTVFTYEEIRSATDGFADSNLLGHGNYGSVYFGLLREQEVAVKRMTATKTKEFAAEMKVLCKVHHSNL…
Solyc01g098410	576	MIFLRRRSITILVLIYFFSNCTTCYSTSCTNGCDLALASFFIWPESNLPLINQLFDNISYSDILEWNTQITSTFILTESRVHVPFRCDCLNNGEFLGHVFSYNVSANETYDLIATRRYSSLTNKELLMRDNRYPDNNIPDHVTLNVTVNCSCGNKHVSKDYGLFITYPMRPGENLSYIALVTNTSSKLIEMYNPMVNFSAGSGLLYIPGRDKLGNYPPISTRKGSSGKTIAALAVASLAGVLLLVGIIYVGIYRRKEQKVAANIPVSSGQCYPPSPGLSGIHVDKSVEFSYQELAESTDNFSISNKIGEGGFGAVYYAELRGKKAAIKRMNREGRTEFLAELKILTRVHHLNLVSLIGYCVERSLFLVYEFIENGNLSQHLHGRDVLTWSTRVQIAMDS…
Solyc02g081040	624	MIFFQENRSFELVLGLLVLNILWVGVKSQCSDDCDALASFYVWNGANLTFMSNTFSTPIKNILSYNPQITNPDIIQSQSRVNVPFSCSCVDGKFMGHQFDVQVKTNTTYPRITRLYCSNLTTVEKLQESNSYDPNNVPVNSIVKVIVNCSCGNSHVSKDYGLFITYPLRPGENLVTLANDFSLPQKLLEDYNPEANFSSGSGLVFIPGKDQNGTYPQLRTSTSSKGFSGGAITGISVAVVLVVALLAVCIYITFYRGRKTEENLNLEPYKHSSNKHIPGHANFENSSEGGSLKQGASPEVPRIAVDKSIEFSYDELAKASDNFSTAYKIGQGGFASVYYGELRGEKAAIKKMDMQATKEFLAELKVLTHVHHLNLVRLIGYCVEGSLFLVYEYIENGNL…
Solyc02g081050	613	MNIRAKTINLSSFFLFIILNGEAKSCGNGCEMAIASYHIWSGANLTYISHLFNLTIPVILNYNPQITNQDSITSDTRINLPFSCDCLNGDFLGHTFVYKTVFGDTYKKVATMAFANLTTEYWLKRVNNYDPTSIPDYAMINVTVNCSCGDGEVSDDYGLFATYPIRPGENLSTVAVGSGVPAELLQKFNPGLDFGSGSGIVFVPARDAHGNFPPLKTRSRGLSRGAIAGTTVAAIFGATFFVVCVYFVFYRSKQAEEESFLQGSSDEHFNENFRPPNLEKITESGPLFGVISPRPTGITVDKSVEFSYEELAKATNNFSMENKIGQGGFGLVFYGMLKGERAAIKKMDMQASKEFFAELKVLTHVHHLNLVRLIGYCVEGSLFLVYEYIENGNLGEHLR…
Solyc03g121050	706	MTHFTKSIKDSIFNTMDHIQLTFLAIICLSAIFKIVPLCSSYPTPSNCTDTGRLCTSFLAFKPSPEQTLPVIQSMFDVLPNDITVEGNGKGYVFIRKNCSCAYGMRKYLTNTTFTVRKNNGSVYNMVVDAYDGLAYFPTNFTREGKKGAVVSLKLMCGCSSGLWNYLMSYVMTEDDTVGSLSSRFGVSMDNIENVNGIANPDNFTAGSLYYVPLNSAPGEPYPVENHTVPAPAPSPSVADISGVEENHKSHAIYWWIIGGLGAGLLLIVVILAFVVCWSSSCFSRTERSHTAGSNEKISHKFQILRNTSFCCASGRYICGNSGDLQEPNGESTDQQINIPKVIGTDVFDMEKPLVFAYEDILSSTDGFSDSNLLGHGTYGSVYYAILRNQEVAIKRMTA…
Solyc06g069610	616	MPRLMASWCCILIFYFLFPLIFPKIITNITSAIPTQLTNIHPFPCSDHIKTCNALLYQHNSLSKQNITFFYSVNASAIEPISYDDRQDYLINVPCTCKDVNGTVGYFYDTIYNLQSGDTFANVSNDIYSGQAWKVGGEDKSYKAGENVTMHLLCGCVEDEEKTVVTYTVQQHDTLSTIGDSLSSQVSDIESLNPYLIRPQFVDVGWLLYVPMYKNGVPLPSTGKNHKAHKWMVLVGILSAVTVLSICTVIVFILRRNRLQRRAKEDAAAVSKSFKMPVFESERPVIYSLEEIAEATSDFDESRIIGAGGYGSVYYGTIGKQEVAIKKMRSNKSKEFMAELKVLCKIHHINVVELLGYASGDDHLYLVYEYVPNGSLNEHLHQPMLKGHKPLSWTTRTQI…
Solyc07g049180	626	MFESRPRSVLSLGVFVILVYLSSVPLPVNSQCNRGCDLALASFYVWRGSNLTLISEMFSTSIADIVSYNNRDNIPNQDSVIAGTRINIPFRCDCLNDGEVLGHAFPYRVKSGDTYDLVARNYSDLTTAQWMMKFNSYPENNIPNTVNLSVVVNCSCGNSDVSKDFGLFVTYPVRAEDNLTSVASAANVSEDIIRRYNPAAVSILDIGQGIIYIPGRDRNGNFPPLPTSTDGLSGGAKAGISIGAIGVVLLLAGLVYVGCYRNKTRKISLLRSEDHLHQYGHGPEGSTTVKAADSGRLADGNSPVLSGITVDKSVEFTYEELATATNDFSIANKIGQGGFGAVYYAELRGEKAAIKKMDMEATREFLAELKVLTNVHHLNLVRLIGYCVEGSLFLVYEYV…
Bradi3g41590	630	MEPPLLLLPLPLVLLLLLVGARAAAAAGDGCSVGSGCDLALGSYLISQNENVTYIAETLFGISNYRLLIPYNPGSRNLDFIPAGGRVNVTFSCRCQSLPSSPSSTFLASSVPYRVSTGDTYLGIANHYNNLTTEAWLQATNAYPANNIPDSGTVNVNVNCSCGDPDVSKEYGLFLTYPLGPNETLASVAPKYDFASPDKIALLRKYNPGMDAVTGRGLVYIPVPDPNGSYRPLKSVDRNGTSTGAIAGGVVAGVVALVVGVLFFLFYRRRKAKQAALLASSEDSLRLGSAVSMEKVTPSTTQTDGTSSAAGITVDKSVEFSYEELFNATEGFNIIHKIGQGGFGAVYYAELRGEKAAIKKMDMQATHEFLAELKVLTHVHHLNLVRLIGYCTESSLFLV…
Bradi2g40627	620	MARHSSLFFFFFLALFVQHLHAVVSLPTLPRRSLEPAAEQWQPMQCAPQSLIPSCNSYLYVTPQGRSLSEIASDFKGNASLIQPIKRLSGSEDLLIPVPCMCEAINATVNALFHDTGYEAIQNDISDDINSNKFSGLAWNLTAGLNKGDTITVHLLCGCSSTAPEGVLSYTVQPEDTLSNIATLFSSGSREILSLNPAVRNPDFIKPGWVLFIPMGVAASSNKKIGGLPIIIAVSISAAVSLLCMSIIILRLKRRSPLPSVEAPKNKMEKVPSNTSIAILESRYFPSKRIDEIDPFQTERPVIFSLKEVGDATVNFDEKRKIGEGGYGMVYLGFIGTHEIAVKKMKASKSKEFFAELKVLCKVHHINVVELIGYAAGEDHLYLVYEYVRNGSLSEHLHD…
Bradi2g49400	675	MPLRRRRLVFLLFLALACSGRGAGAETTSGNATSPPLSCSELSRVCTAFLAFPAAGAAANASVLESMFDASPGDLTADAAASPGYAFVRKNCSCLASRTYLANTTYTVPSAAPPNATAAEVAAAAYAGLAVPPPGGAAHRPPRPSAVVALHLLCGCSSGPWNYLLSYVGADGDTVESLSSRFGASMDAIEATNDMAGPDPINTGKVYYIPLNSVPGQPYSEKSPAPAFAPSPQNTLSEISDHHPARFPYGWVIGSMGVAFALIAIALLVVVMCKFFQYNHQVPDNQRKSPDQPMSHDFRLLKSGSFCYDSGRYLCCQFGNAKKSRKGAGDHRINVPKGMVVDVFDREKPIVFTYEEILESTDLFSDANLLGHGTYGSVYYGVLRDQEVAIKKMTATNAK…
Os08g42580	624	MEASTSLLVLVLAAAAFAAGTVTEAAGDGCSAGCDLALASFYVTPNQNVTNMADLFGIGAANYRSLAPYNPNIPNLDFINVGGRVNVYFTCGCRSLPGSPGATYLAGAFPFQMSRGQIYTSVAANYNNLTTAEWLQATNSYPANNIPDTAVINATVNCSCGDASISPDYGLFLTYPLRAEDTLASVAATYGLSSQLDVVRRYNPGMESATGSGIVYIPVKDPNGSYLPLKSPGKGASAGAIAGGVVAGVVVLAAIFLYIIFYRRRKAKQATLLQSSEDSTQLGTISMDKVTPSTIVGPSPVAGITVDKSVEFSYEELSNATQGFSIGNKIGQGGFGAVYYAELRGEKAAIKKMDMQATHEFLAELKVLTHVHHLNLVRLIGYCIESSLFLVYEFIENGN…
Os09g33630	593	MFSLPALLIGACAFAAAAVAASGDGCRAGCSLAIAAYYFSEGSNLTFIATIFAIGGGGYQALLPYNPAITNPDYVVTGDRVLVPFPCSCLGLPAAPASTFLAGAIPYPLPLPRGGGDTYDAVAANYADLTTAAWLEATNAYPPGRIPGGDGRVNVTINCSCGDERVSPRYGLFLTYPLWDGETLESVAAQYGFSSPAEMELIRRYNPGMGGVSGKGIVFIPVKDPNGSYHPLKSGVGIVLLFCELLCIYAKVAKVQEGHIASISRRNQPPCCYYLCDDASQAEGIKVERSIEFSYEEIFNATQGFSMEHKIGQGGFGSVYYAELRGEKTAIKKMGMQATQEFLAELKVLTHVHHLNLVRLIGYCVENCLFLVYEFIDNGNLSQHLQRTGYAPLSWATRV…
Os01G53840	712	MPPPRRRPPAPGLLILLIFLALASPGEVAGDDAAPGNVTASAPLPCSELSRVCTAFVAFPAAGEAANASVLESMFDAAPGDITADAAASPGYAFVRKNCSCLASRTYLANTTYTVPSAAAGATANATAADVAAAAYAGLAVPPPGGPALRPPRPGAVVALHLLCGCSSGPWNYLLSYVGVDGDTVQSLSSRFGASMDAIEAANGMAGPDPITTGKVYYIPLNSGEQMFSDHSLRQFDQSNFPIYTRSWTTISRDISFLSYSCASTRTKYILRYGDVSEHHSTKFPYGWVIGSMGVALALIAIALLALVLCKLSQYNPQAPNNQGKSPDQSISHKFQLLKSGSFCYGSGRYLCCQFGNVKQSRTDGSDHHMNTPKGVVVDVFDREKPIVFTYQEILASTD…
Os01G36550	618	MSKHGFLFFLLFFVQHLHTIISLLDSPGGSLASLPEWQPMPCKSVSVNPLCSSYLYVTPEGRNLSKVASDFSGNASLFQRITRLSGSEDLLVNVPCVCEAINATMTGLFHDTNYRVKDGDMGDIINSKTFSGLALNVGDGQILHKEEKLIIHLPCGCSSTAPEGVLSYAVQDGDTLGNIASLFRSSWKDILDLNPRVANPDFIKPGWILFIPMGVAGPSNKKVRGLPIIIAASISVAMLLLCVLTIILCLKRRSTLPSVEAPAHKMEKIPSNTSIAALESRFYPSMRINEIDPFQTERPVIFSLRAIEDATSNFDEKRKIGEGGYGSVYLGFIGTHEIAVKKMKASKSKEFFAELKVLCKIHHINVVELIGYAAGDDHLYLVYEYVQNGSLSEHLHDPL…
Total number sequences	42

## Sheet: Seq LYR
ID	AA number		Seq
Medtr5g019040	595		MSAFFLPSSSHALFLVLMLFFLTNISAQPLYISETNFTCPVDSPPSCETYVAYRAQSPNFLSLSNISDIFNLSPLRIAKASNIEAEDKKLIPDQLLLVPVTCGCTKNHSFANITYSIKQGDNFFILSITSYQNLTNYLEFKNFNPNLSPTLLPLDTKVSVPLFCKCPSKNQLNKGIKYLITYVWQDNDNVTLVSSKFGASQVEMLAENNHNFTASTNRSVLIPVTSLPKLDQPSSNGRKSSSQNLALIIGISLGSAFFILVLTLSLVYVYCLKMKRLNRSTSSSETADKLLSGVSGYVSKPTMYEIDAIMEGTTNLSDNCKIGESVYKANIDGRVLAVKKIKKDASEELKILQKVNHGNLVKLMGVSSDNDGNCFLVYEYAENGSLEEWLFSESSKTSN…
Medtr8g078300	590		MVSSFFHTLIFFSATHILLQLPQANGKNFSCTLNSSPSCDTYVAYFANSPNFLTLTAISDIFDTSPQSIARASNIKDENMNLIHGQLLLIPITCGCNGNGNYSFANISHLIKESESYYYLSTISYQNLTNWQTVEDSNPNLNPYLLKIGTKINIPLFCRCPSNYFAKGIEYLITYVWQPNDNLTLVASKLGASPKDIITANTNNFGQNFTVAINLPVFIPVKNLPALSQSYYSSSERKRINHFSIIISIGICLGCTILISLLLLLFYVYCLRKRKACENKCVPSVEITDKLISEVSNYVSKPTVYEVGMIMKATMNLNEMCKIGKSVYKAKIDGLVLAVKNVKGHITVTEELMILQKVNHANLVKLVGVSSGYDGNHFLVYEYAENGSLYNWLLSEFCT…
Medtr1g021845	634		MNQVVFNLILFTLSMLHSSKTKAQQNYSGNSILSCKNNDDAGPSSAFLYTCNGLNKSCMTYLTFKSVLPYNSVSTISSLISSNPNELARINGATLLTVFPSGKDVIVPVNCSCLTNDYYKAETKYILGPNPTYFIVANDTFQGLSTCDSLMRANPYGELDLLRGMELNVPLRCACPTYHQKTNGTKYLLTYSVTWGDNISNIATRFNIPVGNLIDANGFSTQTELLFPFTTVLIPLASEPVSLTTIVANDPPTPLGCSFKKCKSNTKVLLIALTTSLLVLCVFLFVLFLIRFLLRKRSARFVKRCLEVNNKNGVFSEEIREEIAIIEHLSKVYSFEEIKEATENFSSKNRIKDSLFRGIFNNGKEVLAVKRMRGDASKEVNLLKRINHFNLIKLQGYCE…
Medtr5g019050	637		MHLFPFIPFFIFNLFFFFFVSNISIILGQQPYIGLATNACPRKGDSKSIRGYTCNGKTQTCQAYLTFRTQPIYSSVSTISSLLGSNPSQLAEINSVSLNETFETNKMVIVPVNCSCSGNYYQANTSYVFQNTDTYFIVANNTFEGLSTCQALMHENHNPGDVYPGRKLLVPLRCACPTKNQTQKNIKYLLSYLVDWGDSVSFISDKFGVNFRTTLEANTLSLTQSTIYPFTTLLVPLFDKPSSSQIQTHHSPSSSPPLSSSSSTDKKSKKTWVYVVVGVLGGVVIVALILFLYAFISFKKGKKKNDFLVSVSESTIFEEKEKPMKKEDEKLSEIICGIAQSFKVYDFEEIKVATDNFSPSCRVKGTVYRGLIKGDLAAIKKTEGDVSKEIQILNKVNHS…
Medtr5g085790	660		MAWQTLTTLIIITIITTFPKTKSQQEYVNNKQLDCENTYNSTLGNICNSIPSCQSYLTFKSTPQFNTPSSISHLLNSSASLISQSNNISTVQTLPTDTIITVPINCTCSNNNTYYQHNTSYTIQNTGETYFTVANNTYQALSTCQALIAQNPYNERKIVRGNNLTVPLRCACPTKKQSDEGFKYLLTYLVSEGESVSSIAEIFNVDPQSINEANELSSTSFIFYFTPLLIPLKNEPPQKIVKPASPPESPPPPPPAAENGSSSSSTKWVIVGVVVGVVVLLLVGVALFFLCFRRRRQQKLQPPAVGKAFSDSNTKKVSEVTSTSQSWSLSSEGIRYAVDSLTVYKYEDLQNATNFFSEENKIKGSVYRASFKGDDAAVKILKGDVSSEINILKRINHAN…
Medtr7g079350	684		MNTLDLKLHLKIEVQLIKLMKFLYLYILLCMLPYSINCQQILLNTTVTDCSGTPSAPKGYLCNSPQNSCNSFLTFRSKPSYDNPTSIAYLLGSEASTIASINNISRNEKLPTNKTIIVPILCSCSGNIYQHNTPYTVQKGDTYFHLVNETYQSLTTCQALKGQNYYASENIAIGAEVTVPVLCACPTTTQMAKGITSLLVYIVNYGETVKSIGEAYGVDEQSILEANELQPSENRSVILFALTPILLPLRGKSCKEDPDSFYCTCSQGRLADGSCNESHGQKFPAKLVAALGVGIGAGFLVLFLLSYRLYQYIKKKRASIRKEKLFRQNGGYLLQEKLSSYGNGEMAKLFTAEELQRATDDYNQSRFLGQGGYGTVYKGMLPDGTIVAVKKSKHLDRNQ…
Medtr7g079320	679		MELYNYILHFTVLFLCMFSQLFNCQQVYLNNTVFDCTNPSTVPKGYLCNGLKKSCTSFLVFKSKPLYDNPTKIAYLLRSEASAIASINKIPLNEKIPSNKSIIVPVFCSCDGNIYQHSTSYSVKQNDTYYELVKETYQGLTTCQALMGQNYYAPVSIQLDAELTVPILCACPTANLTAKGVTSLLVHMVNYGETVKSIGEAYGVDEHSMREANELSGLQSANSSVILFASTPILVPLRRKNCKENSDRFYCKCSEALHGDESSKGIYCDESPRRKVPAKLVAASGMGIGTVLLCLFLLSCKLYQHIKKRRASTHKEKLFRQNGGYLLQEKLSSYGNGEMAKLFTAEELQRATDNYNRSRFLGQGGYGTVYKGMLPDGTIVAVKKSKELERNQIETFVNE…
Medtr3g080170	659		MRIMVTLFSATILTLILLLNFHIPQTKSQQEYLDNHQLDCDDPSKSTYGNICNSINSCQSYLTFKSSPPHYNTPATIAYLLNSTVPLIANANNISYVDPIPTDTMITVPVNCYCSGHYYQHNSSYTLKTEDENYFTLANNTYESLTTCQALDAQNIYGLTNLTAGLNMHVPLRCACPTSKQIENGFKYILTYLVSEGEYPELIAEIFGVDSQSVLDANKLIEDQVIFYFTPLMVPLKDKPPTKIQRTLPPPSTPLSKPHVENLARNKDSSSSKKWVVVGIAVGAAFLLLIFFVLLFCFCQQHKNKKKLSSAATKTTTEEVSNTNTSITNPSFSLCSEGLRYAFESLTVYEFEELHKATSFFSEANRIRGSSAYRASLKGDDAAVKVLKGDVSVEINILR…
Medtr5g042440	660		MKTLKPHHHQLSTFIFILLFPFLKSQTARQQNNTGYTCPNNNNNNNNTYPCQTYVYYKATPPNYLDLATISDLFQLSRLMISKPSNISSPSSPLLPNQPLLIPLTCSCNFINTTFGSISYSNITYTIKPNDTFFLVSTINFQNLTTYPSVQVVNPNLVATNLSIGDNAVFPIFCKCPDKTKTNSSFMISYVVQPHDNVSSIASMFGTSEKSIVDVNGERLYDYDTIFVPVTELPVLKQPSTIVPSPAPRGNSDDGDDDDDKSGIVKGLAIGLGILGFLLILVIVFWFYREVLFKKEKKGKGLYFGDKGYKGNDEKKKKMDVNFMANVSDCLDKYRVFGFDELVEATDGFDERFLIQGSVYKGEIDGQVYAIKKMKWNAYEELKILQKKGIRQKKKKYLD…
Medtr7g029650	669		MMITFHMRALVFFLWLFLSSSHGSSYHCNENESHNHHCETFALFFTNSHYYSLSNLTLYLGLNRFVIAETNGFSLETEFLPQNQPLLIPIDCKCKKGDFQAELTKTTIKGESFYDIFKSLEGLTTCKAIKENNLGLSPWNLDAKLKLIIPLKCACPFSSFVIPKPKFLLSYPIIENNTVSNLALKFNITKEAIVIANNISSEERSLEPFTSILIPLNGKPFLDPLAKPKQPNTNFPKTNNIPINSQHKKSTMRKSELYIGLIGIAIGIFFALLVSFCFIWFKQRKVEENACKERDMELQYLNQSVRTTSDKKVSFEGSQDTLDSKIIDATPRKMLLETYTIDDLRKATEDFSSNCHIEGSVFHGCLNGKNMAIKRIKTEMVSKLDFGLFHDAIHHHPNI…
Medtr4g058570	603		MGTNLVLMYNNKVMIHLWFIICICINSCYSQQPYDSSNCYSNETSPGSRYTCNSTHDTCKTFLVYRANQNFQTISQISNLFNKNTNEILHINNLTSSSQILKQGKEVLIPIECTCSNQFYQAKLSYKNLESSTTFSNIACEVFEGLLKHVTLSDQNENQGNEPKFGDVIHVPLRCSCPKNYSSIMKGVIKYFVTYPLIQGDNFDKLSKKFGISLDDFLEANQLQPLSSVFPQTVVLIPIRDANGPIKIFDIPDSPSPPPNFLPTNPFTQESTQPSNLYIAGPIIGFVLFITLVASGFYMKKLRKTDDVIDSFNPTNSTTLWSPIRTSTTSCLSPDFLVGIKYCLLNYHIEEIEKATNFFSDVNKIGDFAYKGLINGIEVMIKRMRFEDTSEVIDLHSRI…
Lj2g3v1828350	595		MAVFFLTSGSLSLFLALTLLFTNIAARSEKISGPDFSCPVDSPPSCETYVTYTAQSPNLLSLTNISDIFDISPLSIARASNIDAGKDKLVPGQVLLVPVTCGCAGNHSSANTSYQIQLGDSYDFVATTLYENLTNWNIVQASNPGVNPYLLPERVKVVFPLFCRCPSKNQLNKGIQYLITYVWKPNDNVSLVSAKFGASPADILTENRYGQDFTAATNLPILIPVTQLPELTQPSSNGRKSSIHLLVILGITLGCTLLTAVLTGTLVYVYCRRKKALNRTASSAETADKLLSGVSGYVSKPNVYEIDEIMEATKDFSDECKVGESVYKANIEGRVVAVKKIKEGGANEELKILQKVNHGNLVKLMGVSSGYDGNCFLVYEYAENGSLAEWLFSKSSGTP…
Lj4g3v0912440	591		MTSFFLFTNTLFLALMMFFSTTHHILAQLSHTNGTNFSCPVDSPPSCDTYVTYFAQSPNFLTLTSISDLFDTSPLSIARASNIKDENQNLVPGQLLLVPVTCACSGSNSFSNISHMIKEGESYYYLSTTSYENLTNWETVQDSNPNYNPYLLPVGIKVVIPLFCKCPSNYHLNKGIEYLITYVWHNNDNVSLVASKFGVSTQDIISENNFSHQNFTAATNFPILIPVTQLPSLSQSYSSSERKRSNHIHIIISIGISLGSTLLIALLVLVSVTCLRKRKSSENKSLLSVEIAGKKLISGVSNYVSKSILYEFRLIMEATLNLNEQCKIGESVYKAKLDGQVLAVKKVKEDVTEEVMILQKVNHLNLVKLMGVSSGHDGNHFLVYEFAENGSLHNWLFSN…
Lj0g3v0145339	628		MDLAMFLLIVLTQSFLLCSNATANQNYSGNSILRCKNDTTDFLYTCNGVQKSCIAFLIFKSKPPYTTTATISNLTSSNAAGINTATNFPTGKEVIVPVNCSCQTKDYYEAETKYVLPQKPTYFTVANNTYQGLSTCDSLMHANPYGVLDLLPGMELKVPLKCACPTRNQIMNGVKYLLTYPVNWGDNISYLAQRFNLSADSLVDANGFSSETEILYPFTTVLIPLPTEPTNSLTIVHEDQPPTSPSLVSIGKSTNRLKLVVAVATTGSFMLVLCFILVTLFLLRKRRRARFFKRGAKGKTVPDSSEDLRDEIACIELLSKVYKFEEIKEATENFSSKNRVKGSVFRGMFGSESKKGNLTLAIKRMNSDAYKEVNLLGKINHFNVINLKGYCENDGFFYL…
Lj2g3v1828320	633		MHCFPFTLIFLSTLFIFFTFPITLAQQPYIGLATNACPRRGNSNSIRGYTCNGGSANHTCQAYLTFRTQPIYNSVYTISTLLSSDARHLAETMSVSQNTTFETNKLVIVPVQCSCAGEYYQANTSYAFQNTDTPFSIANNTFEGLTTCQALMHENHNPGHLYLGRELTVPLRCACPTKNQTEKGIKYLLSYLVNWGDSVSVISEKFGVSCNNTLEANSLSLTKAKIYPFTTLLVPLHDKPSNSQTILQSQPSSTSSSPPPSSSTHQSSNKTWLYVVVGGVFALIVLTAVIFCIHYHKGRKKDDSLSQLTVSESFENQQLGKEMKKGDGKLSEFIHGIAQSFKVYSFEEIQRATNNLNSSSLIKGSVYRGVMNGDLVAIKKTEGDVSKEIQILNKVNHSN…
Lj2g3v2899910	667		MLLCSSSTSITMTVLLLLLVAMSFHMISETQAQQEYLNNNQLDCDNTHNSTYGNVCNSVTSCQSYLTFKSSSPEYNTPSSISYLLNSTPSLVAKSNNITDVTPIITDTMVTVPVTCSCSGGRYQHNATYNLKKTGETYFSIANNTYQSLTTCQALMAQNPYDAKNLFAGDDLHVPLRCACPTKKQSDAGFKYLLTYLVSQGESPDSIAEIFGVDTQSVLDANELDSKSVVFYFTPLLVPLKTEPPARLQIAASPPESPPPAPAGNDSSSSSKKWVIVGVTVGVAVCLVVALLVFFLCFYNRRRRQPAPPPVSVKDFPDSAVKMVSETTPTTESWSLSSEGVRYAIESLTAYKFGDIQTATKFFSEENKIKGSVYRASFKGDDAAVKILNGDVSAEINLL…
Lj2g3v2899900	666		MLLFTSSSSNSITTITMLLLVMIISFSHMIPSTQAQQEYVNNKQLDCDTQYNTTYGNVCNSVTSCQSYLTFKSSSPEYNTPSSISYLLNSTPSLVAKSNNITDVTPIITDTMVTVPVTCSCSGGRYQHNATYNLKKTGETYFSIANNTYQSLTTCQALMAQNPYDAKNLFAGDDLHVPLRCACPTKKQSDAGFKYLLTYLVSQGESPDSIAEIFGVDTQSVLDANELDSKSVVFYFTPLLVPLKTEPPARLQIAASPPESPPPAPAGNDSSSSSKKWVIVGVTVGVAVCLVVALLVFFLCFYNRRRRQPAPPPVSVKDFPDSAVKMVSETTPTTESWSLSSEGVRYAIESLTAYKFGDIQTATKFFSEENKIKGSVYRASFKGDDAAVKILNGDVSAEI…
Lj3g3v3082380	603		MMISKTMIHLWFFSLTCFNACSAQLDYDQSSCTSNESFPGSRYTCNSTHDSCKTYLVYRANERFKTISDISNLFNMSSRQVLHINNLISSSEILKQGKEVLIPVDCTCSGEFYQASLSYKVPEITTFSEISCGVFEALLKQLTMAEENLSQGESPEVGSELQVPLRCACPGNFSSGKKVKYLVTYPVILGDDLDQLTQKFGISPEGFLEQNHLNSLSTLYPQTVVLVPIDDDPIRIFEIPDSPSPPPGFLPTNPVKLHKSLESSHLYIAGSVLGLVFFTTLLASGLYMKRVKKSDSVHSFNTTNTLWSSPMRTSPAWCLSPDLLLGIKYCLVNYHIKELEKATKSFSEENKIGDFVYEGLINNIEVMIKRMRFEDTSQVIDLHSKINHINIVNLLGVCY…
Lj1g3v3834250	672		MIIIPFHMGGALVFFLCFLVPSLGKNLLTCETTSPYDASGYYHCNEKVSHSLSHCGTFALFLTNSHYPSLSNLTFYLGLNRFVIAEANGFSAETEFLPQNHPLLIPIDCRCKGEFFQAELTKTTIKGESFYSIAESLEGLTTCKAIRENNPDVSPWNLDDNLRLIIPLRCACPFSSEPRILLSYIVREGDTISNLASKFNITKEAIVSANNISLEGLGPKKLAPFTSILIPLNGKPIFGPLAKPMEPNSSFPTTRIPTHKKSAMWKTELYIALAGVAIGVFIAFAAAFFVIRLKQKKVKENSSKERDMELQYLNQSVRTTTTSDKKISFEGSQDTLDGKMVDTNKMLLETYTVEDMRKATEDFSSSNQIEGSVFHGRLKGKDIAIKRTKTEMVSKIDLS…
Lj1g3v2808030	678		MELHYHLQILSTTLLLFMFPQPLNSQQLYLNSSVYDCTDNPSAPKGYLCNGLKKSCTSFLVFTSKPPYDNPLSIAYLLGSEASTIASINNISMNGKIPTNKSVIVPVFCSCSGNIYQHSTPYTVVKNDTYYMLVKTTYQGLTTCQAMMGQNYYAAVSIAVGAELTVPVLCACPTSNLIAKGVSFLLVHMVRDGEMVNSIGEAYGVDEQSMREANGLPVVPSSANNSVTLNALTPILVPLRGQSCKENPDKFYCKCSQALHDGSSKGLFCNESDGQKFPAKLVVPLGVGIGAGFLCLFVSGYKLYQYIQKKRKRIHTEKLFRQNGGYLLQEKFSLYGNGEKAKLFTAEELQRATDNYNRSRFLGQGGYGMVYKGMLPDGTIVAVKRSKEIERSQIDTFVN…
Prupe.7G147300	619		MAISFLGSQPLYILLLFFFTTQILAQPAPSNSSTSFSCSVDAPPSCDTYVSYLAQPQFLSLGNISDLFGVSSLSITKASNLVSEQIRLIAGQLLLVPITCGCTGNSYFSNITYEIKKGDNYYLVSINSFENLTNWHAVLDMNPTLDPTLLQIGVKVTFPLFCKCPSKMYSDNGVKHLITYVWQPNDDTFRVSSKFNVSPLDIVTANDYRNFTAAVGLPVVIPVSKLPALAQPKPPHGRNIFKQRWWLILVITLGGVLAVSSLFAMFVVYSRRQHKRKKALNGTGSSLESPEWFNMKEGKRDEKLELKFIQDKLLPGVSSYLGKPIMYEIKTIMEATMNLNEHCRIGGSVYRAIIDGQVLAVKNTKEDVTEELNILQKVNHANLVKLMGISSEAQGFRFL…
Prupe.1G027000	626		MSTKPKYVSSALLFFLCYHLFLHHSQAQIVPRPVTEGYTCTANQSSYPCQTYVFYRASAPDFLDLATIGDLFSVSRFMISKPSNISSSNATLVSGQPLFIPIPCSCNSPNATMTISYANLSVTIKSGDTFFRLSSRSFQNLTTYQSVELVNPHLVATNLTIGVTALFPIFCKCPNRTQLQNQVNYLVSYVFQPSDNISAVASLFGVQAKSITDVNGNNIQPFDTIFVPVTQLPELSQPDVTPSAATSVKTERKGLIRGLAIALGITGFLLILVVGFSIYRDGKLKKRVRRKGDEEKENQVLYRSKQGSKKSKEMEVSLMADVSDCLDKYRVFGIEDLREATNGFRENSLIEGSVYRGSINGELYAIKKMKWNACEELKILQKVNHGNLVKLEGFCIDHD…
Prupe.7G147600	660		MSFLSLILSAIILTTFSCCSLIVAQQPYEGKAFTDCYNTNTYSKSVLGYSCNGVNKSCQTYLTFRSQPPYNSVSAISAMLASDPSQIAEMNSVSETATFETNKLVIVPITCSCSGDFYQLNTSHVVVHGDTYFVIANNTLQGLSTCQAMMNQNTNLTTKELYSGTRLSVPLRCACPTKNQTDVGTKYLLTYIIAQGDYVSKISATFDSDTGRTLEANGLSEQASTIYPFTTLLVPLQNPPSSSQTIEPPSSSPSPPAPPSTSSNNSTKKWVYAFVGALGGGAFVLVIGIIIFCTFFRRSRGTKGFNSIIVSERFEALEKPLEKKEEEGSQDFLEALSGIAQSLKVYKFEELQRATDDFSSTYLIKGSVYRGNINGDLAAIKKMNGDVSTEINLLNKTSH…
Prupe.7G147500	636		MDCSILRFLLLLLITPKLKAQQSYAENSALDCADSDDRGSLPTFLYTCNGEKKSCKAFLIFQSQPPYNSVSAISNLTASDPSELARINNISDHTLVLPQSKEVIVPVVCSCSGEYYEAKASYLIPSIGDTYYTIATDTYQNMSTCNALMHENNYSALSLQPGFELQVPLRCACPTSNQTFNGTKFLLTYLVSWGDSVPVVSERFNVSAKSVAYANGFTEDDPLVYALTPILIPLSVEPSSSQTIIQYPPGPPPRLSLPVTPIHGNRRSKKAYVWIGIGILVLVLCLAIFGVFLYHQKRVSQNNIEGKKKWVLHESFFVTIAEEVDVGLKVFEYEELKGATEDFSNKNCLGGSVYRGFFDGKVLAIKQMSKDATEEVKLLKKINHFNLISLFGACEHCED…
Prupe.6G104800	615		MIYLCFFILVCLNLSYAQQYYDPTECASDASYSGSRYICNMFQNSCRTFLVYRANPHFRTVSNISELFQMDSDALLGLNNLTSPSEALRAGREVLIPIDCSCSGQYFQASFSYMVSENTSYSEIACGVFEGLLKSFTFREENLSQENKLKVGTKLLLPLRCACPDKLASSSGVKYLVTYPFVEGDRPIILSQKFGISPEDLWAVNHLGPSQTVFPKTTVLVPLRAPPVLNFNILDSPPPAPDFLPTNPVEKTVKNTKVKKLYIAGSVVGFSLLLAALIAFIILYRRALKKWKSEKLQSFTALSSPISCSTVRSPIKSGQTGRSSPISSCLSPDILAGLKYSLFNYSLEELRRATRDFNEENKIGSLVYRGLINNVEVMIKQMRFEETSHVIDVHSKINH…
Prupe.3G303700	696		MAAALLTKLHLIVSLLFNSLLVFAALGHKSQNLLSCETTSPDASGYHCTSAGTNGSSLENQCRTFLILRTNSYYSSLFNLSAYLGINRFVIAEANGFSADTQFLPKDEPLLIPIDCKCSSNEGLFHAELTKTTIKGESFYGIAEALEGLTTCKAIREKNWGVSPWGLADKLQLLIPLRCACPSSSSQSRLLLSYPVSEGDSISDLAIKFNTTKEAIISENNRSLGGTFRPESSLTPLTSLLIPLNGKPILGPLKKRREPNLHFPATSIPAISPHKKKAKMHKIGLYVALSGVIIGASIAIAAAFLLIQLKKKKQSSPKGGDVELQQLSLSVRTTSDKKVSFEGSQDALDGQIIDSTTPHKVLVETFSIEELRRATEDFSSSSHIEGSVYHGRLSGKNLA…
Prupe.6G357200	663		MELFSFSILYAYLCLSLFYQPARTQQAYINGSTLWNCSGNPATSKGYLCDASVKSCEAFVTFRSRAPHDTAISIAYLLGSEASKIASINKVSASDKIPSNKLIVVPVSCSCSGNIFQHYSPYTVIKNDTYFKTANDTYQGLTTCQAMISQNYYDPENIPVGAVLTVPVRCACPSENQTADGITSLLTYIVAKNDTIASIGGMFGVNTQSIMAANMLSQDIIIDLNTPLLVPLKSKRCPTSDGSLADGIYLEHVDCIRGGKKFPVKLVTLLGIGIGLAFICMFLSGYKLYQFLRRRRIKTQQEKFFKQNGGFLLREKISSFGSSSKAKLFTAEEMERATDNYNQSRFLGQGGYGTVYKGMLLDGTIVAVKRSRAIDKHQIEQFINEVVILTQINHRNIVK…
AT3G01840	654		MAVSVSKQYMTSLVVILLFISLSSLSPTSTSHSCDPVEEEEEASSFGYVCHSNLQKCHTFAILRAKPPFYSLSDLSRHLGLDADDEYVPKGQLLLIPIECRCNGSIYEASLIKNCVKGDTFRSVSQSLQGLTTCLSIREKNPHISEDKLGDNIKLRLAIRCSCPQEGVSNASFLVTYPVGVRDSVSSLAVRFNTTEDAIVSANNKSGVVPLKPALIPLDHKPEKQGSRKRNPSKKKRSKMKLMIAVSSAIAGVCGLVTLMVFGYLHWKKETQIQTQTQKWISNKDPETRQLSLSIRTTSDKKISFEGSQDGSILDSHNTVGTTTPRKPVLEIYAFEELEKATENFSSSNHIKGSVYFGSLKGKDLAIKQVNADEMKRFDFGLLNDQSHYYNHNVIRVLG…
AT2G33580	664		MAACTLHALSVTLFLLLFFAVSPAKAQQPYVNNHQLACEVRVYDNITNGFTCNGPPSCRSYLTFWSQPPYNTADSIAKLLNVSAAEIQSINNLPTATTRIPTRELVVIPANCSCSSSSGGFYQHNATYNLSGNRGDETYFSVANDTYQALSTCQAMMSQNRYGERQLTPGLNLLVPLRCACPTAKQTTAGFKYLLTYLVAMGDSISGIAEMFNSTSAAITEGNELTSDNIFFFTPVLVPLTTEPTKIVISPSPPPPPVVATPPQTPVDPPGSSSSHKWIYIGIGIGAGLLLLLSILALCFYKRRSKKKSLPSSLPEENKLFDSSTKQSIPTTTTTQWSIDLSNSSEAFGLKSAIESLTLYRFNDLQSATSNFSDENRIKGSVYRATINGDDAAVKVIKG…
AT2G23770	612		MISFSFHLLVFILLSLSSFATAQQPYVGISTTDCSVSDNTTSVFGYSCNGLNKTCQAYVIFRSTPSFSTVTSISSLFSVDPSLVSSLNDASPSTSFPSGQQVIIPLTCSCTGDDSQSNITYTIQPNDSYFAIANDTLQGLSTCQALAKQNNVSSQSLFPGMRIVVPIRCACPTAKQINEDGVKYLMSYTVVFEDTIAIISDRFGVETSKTLKANEMSFENSEVFPFTTILIPLVNPPANTNSLIPPPPPPPPQSVSPPPLSPDGRKSKKKTWVYALAGVLGGALVLSVIGAAIFCLSKKKTKTQTQEETGNLDSFMGKKPPMSDQEFDPLDGLSGMVVESLKVYKFHELQSATSDFTSSSSIGGSGYIGKINGDGAMIKKIEGNASEEVNLLSKLNHLN…
Brara.E03634	597		MAGSVSKECMISLIMIFFTWSLCATSNDLLSCDPKESSSSSSTSYVCHSNLQKCRTFATLRANSPLRGHELQFIPIDCTCNGRFYEAHLFKPCVKGLTTCLSIRDKNPQVSEEKVKLRLGVKCCCPEEGAARFLVTYPVSEGESVSSLADKFNTREDAAIVSANNNSGVVPRTPALIPLDHKPQNTLPSRQKKKRSKMKKLMIAVSSAIAGVMGLITLIVLGYLHWKKETRLQSWISNKDPETRQLSLSIRTTSDKKISFEGSSQEGSILDSVVVVGTTTPRKPVVEIYALEELEKATENFSSSNHIKGSVYFGSLKGKDLAVKQVSAGVMKRFDFGLLNDQSHYYSHNLVRVLGTCSPPGPDEGASYLVFEYAKNGSLWDWLQNKLAIKNQFIESCYC…
Brara.D02042	665		MAARTLHSLSTSPLFLLLLLSALSPPTKAQQPYVNNHQLACENRDFDNITNGFTCNGPRSCRSYLTFWSLPPYNTPNSIATLLNASAAEIQTLNNLTSLTTTIPTRRLVVIPTTCSCSGGGGFYQHNATYRLSGERQETYFSIANDTYQALSTCQAMMSQNPYGERNLTAGLNLLVPLRCACPTANQTAAGFRYLLTYLVAQGDSVSAIAEMFRSSTPAVSSGNELTSDNIYFFTPLLVPLRTEPTRIVITPPSPTPPVATPPQSPPVDPQGGSSSSHKWIYIGVGIGAGLLLLISILSLYFCYYKRSSKTASLIEQNKLTDSSTKRSLPTTSTNQWSIALSNSSDTTSGLKSAIESLTLYRFSDLQSATLNFSEENKIKGSVYKATINGDDAAVKVIK…
Brara.D01416	642		MKRPFPTFLLLTFNKPLTFPTRFLYIQLLAFAARSCRIKTMIFFFIILLQCLSLATAQQPYVGTSTTDCSVTDNSTSVFGYSCNGLNRTCLTYVIFRSTPPFSTVTSISSLFSVDPSLLSSLNNAATTFSTDQQVIIPLTCSCSGNYSQSNLTYTIRQGDSYFRVANDTLQGLSTCQALERQNNASSQSLFPGMRILVPLRCACPTAKQVSEDGVNYLASYTVVFGDTVDVISQRFSVETSKTLEANQMSFDDAGVFPFTTLLVPLQNPPSNLNSMTPPPPPPSPPPPPVSPNGKKQKRTWVYVLVGILGGALVLSVIGAAMFCMLKTVSRKKQEPDNLDSFTAKKTSISYQESDFDPLDGLSGMVVDTLKVYKFHELQSATSDFTSSSSMGGSGYIGK…
Solyc09g083200	382		MITKPIFGFSLLIFISFIFNQNICYAQNPPSITGYTCNPNQFNPCQTYVLYRARGPQFLDLASIGDLFSVSRLMIANPSNISNPNTTLVNDQPLFVPIKCSCNNINSTFGSISYAGLNYSFKAGDTMYDMSVTKYQNLTTYQSVEAVNPTVEATKIAIGQTIKFPIFCKCPTTRQNQPRLLITYVFQPNDNISSIASRFRITPQSITQMNGNNIKILDTIFIPLPNLPNLTRPASSNTPPPPPPPTAPAPVIQENDRKGTVIWLAIGLGVCGLLLILILGLFYKEKTVKREKYSDIERQKSLYVGSKKGSIVDKDVEVNLMADLSDCLDKYKMYKMEQLWEATNGFDEECLIQGSVYKGTIDGEVLAIKKMKWNAREELKIL
Solyc11g069630	636		MIFHWLLVVVIIVTYVGSSYGQQYYDSTSCHSSITSLGTRYTCSTSPNDSCETFLIYRTNQDFTTISDVSYLFGILNPDDESLLRTNNVTSSSQILEIGREVIIPIHCSCPGEFFQANVTYITPTNTNFNDVACGVFEGLVKSVTLVQENIFTNMFDNSEIRSGTQLIVPVKCACPDKLFGPGINYLVTYPFISGDDTGKVSEKFNIPVEDIWRVNNMSFNPTVYSNTTILVPLRNEPSINFSIQDSEPPSPGFLPTQLVEKSTKNQKLKKLYISGSIVGFLLLAATLIACGLYVRTLRKFKEDRCVHRSTMHKDSVSSCSTLRSSPPISGPTTTRTSTNSCLSPDLFAGIKYTLGEYNIDELTNATCDFSEETKVSNNVYRGCVDKVEVLIKKIRFED…
Solyc02g065520	617		MVVPLVSLFYNFFLFLILSSSNVTAQPSSTDTDFSCSFNSSFSCDTFISYRARPPNHLDVGSISDLLEVSRLSVATATGLASEDTELFPDQLLLVPVKCYCNSSHYFSNVTYQIRKGDSFYSVSIRAFENLTNYHVVQDMNPTLDPTNLTIGAEAVFPLFCKCPTHSDLEKGLQYLVTYVWQPWDDVLPVSNMFGASAADILAANNYRNFTAAICSPVLIPVKLPIILQSYPSSASSRKSKHGWIVITVLGIMGLLAVFSFCLMVYMRHLEEKRRSNLAHNSSTLETSDLFHTKKASEGEIMDHKNIQDKLLPGVSGYIGKPIIYDLKIIMEATVDLSERYRIGGSVYKATMNDQVVAVKKRKQASEELTILQKLHHANLVKLMGVSSDDLGNSFLVYE…
Solyc02g094010	669		MIVAFQFWAFVFFFLFITLSAHGEDLLSCDSKSPSASGYRCDRNVHLLQCGTFGILRTNSLYDSLFNLSSYLGINQYLLREANGFSPDTEFLATDQPLIIPLDCKCIGGFFESELRKTTTKGESFYSIAQSLEGLTTCKAIQEKNPNVTPWGLSEKTLLSIPLRCACPSPQEITLRTKLLLSYPVKQGDTIAALAVSFNTTVDRIIDVNRRSQGASFRTNGLSPASTLLIPLEGKPKLGSFTKPQQPNLGYPAASIASSKIHKKKTKMRMMRVYIAVALVVFVAIFALPAVFLFYFLKRKGDILSKERDTELQKLSLSVRTTSEKKVSFDGSQNDLDGQIIDATPHKLFVETYTIEEIKKATEEFDSSNLIEDSVFHGRISGKNLAIKQMETSSISKID…
Solyc09g083210	629		MITKPIFIFSLLFFLSFILNQNIICYAQEPPSITGYTCNPEQFNPCQTYVLYRARAPEFLDLASIGDLFSVSRLMIANPSNISNPNTTLVNDQPLFIPITCSCNNINTTFGSISYAGFNYSFKSGDTMYGVSTSKFQNLTTYQSVEAVNPTVVPENIDIGQAIKFPIFCKCPNTTSSQNQPRLLITYVFQPNDNISSIASRFRVTPQSITQINGNNTKILDTLFIPLSNLPNLTQPTSSNTPPPPPTPSAPVNQEKDRKGTVIGLAIGLGVCGVLLILVLGLFYKEKTGKKEGYGDVERQKSLYLGSKKGSFVDKDVEVNLLADVSECLDKYKMYKMEQIWEATDGFDEGCLIQGSVYKGTIDGEVFAIKKMKWNAREELKILQKVNHGNLVKLEGFCI…
Solyc02g089920	616		MGDFPLIFFISSIILASKVYAQQNYSGNTVMSCKGTNETGTTASFLYSCNGEKFSCRSFVIFRSDSPYNTVSYISKLLSSNPDEIVHINNISRFKILDQNQEVIVPVNCSCSGQYYQADTSYVIPSKYDTYFRIATSTYQGLSTCSAVMHENVYNALDLFPGLNLRVPLRCACPTRDQSRNGVKYLVTHLVTWGDNVSSISAQFSVSSQSTAYANGLSENSVLYPFTTVLIPLPKEPSSSETRTIKREHTETSYPSRHKISYGSLFIGVGTGVSLAVLCFILFIVLKHKKENGRGEILGNRRQGKQKRNLPEHVLESIVGEGQMIKVYEFEELLAATENFSSRKKFGHCVYKGVLRGKLMAIKEMSTDISKEVKFLAKINHFNLISLAGFCKHHQLSYL…
Solyc02g089900	645		MNYSHLIFVFTIILAYSSVSILAQQPYFGTGTNDCSSQDTSTSAFGYLCNGVNRTCQSYLTFRSQPPFNTVSSISSLLGANPSQLSQLNSVSQNATFNTNQMVLVPVTCSCSGQFYQSNASYVIRRDDSFLNIAMNTLQGLSTCQAINAENSEQANNLVVGSRINVPLRCACPTQNQTNNGTNYLLTYLIASGEFVSFISDKFGVDFRATLAANSIPEDAPTVFPNTTLLVPLSTPPLSSQVAGPSPPPPPATTPTPPAVPVSESSSNKTWIYVVAGVVGGLVALCILGVVVFFLFFRKKEKKADPQFVSESFEAVEKPSNKKVEEESEEFLESLSSIAQSVKVYKFEEVKAATENFSPTCLIKGSVYRGTINGDFAAIKKMSGDVSKEINLLSKINHF…
Solyc12g089020	599		MNWLLNILCILNFLISCTKAQQEYSGNSVLNCENEIGTNYSCNGRNSTCQAFLIFKARDPYNSVPGIAALMSSNMSEIARINNVTRLTVFAPEKEVIIPVDCSCSGLYYQAKTMYYISALIETYFVIANNTYQGLSTCNALVCQNEYDEFSLRPGLELQVPLRCACPTAKQAAKGSKYLMTYSINVGDDILTVGKRFKVNGRNIIEANGFLDENSVLYPFTTILIPLPSEPSNLDTGNENYRKPIRSFSPPSAANASKGKSKRNLYIGSGVATGFVVSWVILLALFKKRDSKFPRRSSSHEDILVEIANIDHVPKVFKFKELKHATQNFDSKNRIKGSVYWGGFKGETLAVKMAIMDVSREVNILHKINHFNLIKLCGYCEHKGCFFLVFEYMQNGSLR…
Bradi3g51790	656		MKPWCLLPWRRLALATLLCVCTLPAPARSQSAPAPAPAPASVEGFNCSANSTYPCQAYALYRAGFAGVPLDLSAVGDLFGVSRFMIAHANNLSTTAAPAAGQPLLVPLQCGCPSRSPNAYAPTQYQIDSGDTYWIVSVTKLQNLTQYQAVERVNPTLTPTKLEVGDMVTFPIFCQCPAAAGNDNATALVTYVMQQGDTYASIADAFAVNAQSLVSLNGPEQGTKLFSEILVPLRRQVPQWLPPIVARNSVPVTPAPPPSATPNPSVATDNQNGVVTGLAVGLGVVGGLWLLQMLLLACLWRRLKAKAGRGREAVVSGESGEAGRFAKSGSAGGVGGERFLVSDISEWLDKYRVFKVEELERGTGGFDDAHLIQGSVYKASIDGEVFAVKKMKWDACEEL…
Bradi3g06770	697		MARALGSRTAALTLTLLLSLLLLTMAAAQQEYEANKQNACYSTNSSSVLGYVCNATAAAASAPCATYLVFRSSPPYYQTPVSISFLLNSDPAAVADANAVPTVSAIAASHLVLAPIPCACSPRGFYQHNATYEIQFDEETYLIIANNTYQGLTACQALIAQNPDHDSRRLVKGNNLTVPLRCACPSPAQRAGGVRHLLTYLVTWGDTVSAIAARFRVELQAVLDANSLTGTETIFPFTTLLIPLKNAPTADMLVSPASPPAPSPPQTSQPPADGGSGSGRWVAVGVGVGVGVLALAGLAVLALIWVRRRRARPGVGEESGRPGRSKVALDVPSSADYDALASGKHTTGTTTTTTSTSSSSAAAMRTLLSSDARAAAESLTVYKYSELEKATEGFSEQRR…
Bradi1g69290	681		MKLCSAARYWLRTGAVLEIEPSPSSTSHHRCDSLRNTHTGRQMEHRRFGCPLLLLLLVVVLIFRCSEAQDVANGTERFACDVPAPCDTFVVYRTQSPGFLGLGSISDLFGVSRAMIASANNLTAKDGVLLPDQPLLVPVECGCTGNRSFANVTYPIQDGDTYYALALTAFENLTDFNIMQQLNPQAPATRLQAPEEVTVPLFCRCPTQAERAGGIRYHITYLWRPEDDMSTVSTLMNSSKSDIAEANNVTTEFTSPTAQPMLIPVSQPPKLPPLRYDASADGSGANKRGRGVAVAAGVAGSLVAFAALCVAAFAYRRYRKKKETVVQLGSPYATPKLSWHKHQQQHNYGLQSSSSLARMMNGGGDKIITSVSQFIDKPIVFGADEIMEATMNLDERCRI…
Bradi4g16350	676		MAPSRATAALLFSAAVFVLLSGARSQQPYGTQIGDCHNKHNDTGMLGYFCNGAPSCQSYLTFRARPPYSDPASIAALLGANATNLAAANSASPSSSSSFAPGTKVLVPVPCACTGRGRGHYQSNVTSYVAVPGDTLLIIAKGTFQGLTTCQAVQEQSLGGKPPESLLAGQRLPVVPLRCACPSAAQAAAGTRFLVSYLVDEFDEVRAVAARFGVDAAGIAAANGLKSDGTIFPFTTLLIPVKSPPDISQLRSPPPPPPPPPAASVPAAEKRSNHAGVYIGVGVAVAAVAVIASVGAVLARKARKRARAGAAVATTGKGTGKASHGTTSAGEVSVTISEAFSSLSDIKSSLKVYTYEELTAATDDFSAARRIGGSVYRATFGADTAAVEVVAGRDASKEV…
Os03G13080	624		MEHKGLCILAVVIAFQLAGGEAVTDATARARRFACNVSAPCDTFVVYRTQSPGFLDLGNISDLFGVSRALIASANKLTTEDGVLLPGQPLLVPVKCGCTGARSFANVTYPIRPRDTFFGLAVTAFENLTDFVLVEELNPAAEATRLEPWQEVVVPLFCRCPTREELSAGSRLLVTYVWQPGDDVSVVSALMNASAANIAASNGVAGNSTFATGQPVLIPVSQPPRFPPLTYGAIAADPGAGKHRHGIIVATSIAGSFVACAVLCTAILAYRRYRKKAPVPKHVSPKLSWTKSLNRFDSNSSIARMINGGDKLLTSVSQFIDKPIIFREEEIMEATMNLDEQCKLGSSYYRANLEREVFAVKPAKGNVAGELRMMQMVNHANLTKLAGISIGADGDYAFL…
Os02G45750	650		MTPRRRLALPALLLWCLCALPAPARSQSAATPAPASNEGFNCTANATYPCQAYALYRAGFGGVPLELAAIGDLFAASRFMVAHANNLSTSAVLAARQPLLVPLQCGCPSRSPNAYAPMQYQINAGDTYWIVSTTKLQNLTQYQAVERVNPTLVPTNLDIGQIVTFPIFCQCPTAADNATALVTYVMQPGDTYASIATAFAVDAQSLVSLNGPEQGTRNLSSPEILVPLRRQVPEWLPPIVRVNNISTTPASPPPSNTPAPTVVSNNRDGVVTGLAIGLGVVGGLWLLQMLLLGCLWRRLKARGRRAEAVASGDGGEGGRFTKAASGGGGGGGGRFLVSDISEWLDKYKVFKVEELESGTGGFDDEHLIQGSVYKAYIDGEVFAVKKMKWDACEELKILQ…
Os02G09960	689		MAETPRRIRRGGAGLSLVVVALLLAVAARAQQEYEANQQNACYATNASSTLGYTCNATSASAAAAAPCDAYLVFRSSPPLYASAVSISYLLNVAAAAVADSNAVDPVAPVAADRLVLAPVPCGCSPGGYYQHNASHTIRDTGVETYFIIANLTYQGLSTCQALIAQNPLHDSRGLVAGDNLTVPLRCACPSPPQAAAGVKHMVTYLVTWGDTVSAIAARFRVDAQEVLDANTLTESSIIYPFTTLLVPLKNAPTPDMLAPPAQAPPPPAPAPPRAQPPPGGSGSGKGVAVGVGVGCGVLALAGVFGLLFFCLRRRRGVGEESVRPGKVVGDVSSSAEYGALASGKQTTTATSMSSLSAARSLMASEVREALESLTVYKYSELEKATAGFSEERRVPGTA…
Os06G41980	667		MSMLPRFLLLVVLLAVPMTAAQQQYEANAQGDCYTDNGSSVLGYTCGTAASPPPPPCTAYLTFRSAPPSYASPITVSYLLNASVPAVAAANSVPVSPPVARDGLLLVPVPCACTAAGYYQHDAGYVIQFDDETYFVMANDTYQGLTTCQALMAQNPAHDSLDLYPGIRLTVPLRCACPSPAQAAAGVRYLVTYLLGWDDDSSTVADRFGADYQAVLFANNLTDDSTVYPFTTMLVPLKHRPKPDVTVLPEPGPPSPAPAPAVSAPPPPAVPSSESGSGRWKKSFRGRCIGIGVGVGFAVLASGALLALFLLRRRWRWRGNGELHDVPLAPDKEGAKATPPPWMLPTTVADVDVRDAVGSMAVYEYGELERVTAGFAEERRIGDSSVYRAVINGDVAAAV…
Os06G41960	630		MPPGARARRIAALDLIFLVFLRLASAYQRPSDAHINCIDSFCLGGYTCSETTATTSCTAYLTFRSDPPLSVAYLLNATPSAVAAANSVPLAVSPVDGTQLLLVPVPCSCNRATGYYQHNTTYAIQELDTFFLIANNTFQGLTTYQSIIANNPASEAMSPVINGPLAVPLRCACPSATTGRINNLLTYVVQEGDNVTSIARRFNSTHGDVLAANTLLVPLVHPPHSRVVLANTTITSTTPPESQKFYVSSPCSNGLLAGLGIGVGCGVSAWAAVLAVFLLWRRRRRRPVGDSSGMARETPLVAAVRGAVETLAAYSYADIETATAGFAEERRVAAGSSVYRAVINGEAFAVKRVAAGGDDVRGEVDVLGRVNHSGLVRLRGLCANGDDTYLVLEFAENGA…
Os11G35330	684		MAQSRSHAMAAFAFVVVFLLSGAPGARSQQPYGSQVADCPNKHNDTGLLGYFCSSGGGGGGAPSSSSSSCQTYLTFHATPRYPDLAAIASLLGADASSLAAANSAALPTAALAPGAKVLVPATCSCTGAAYYQRNATYVAVAGDTLLVIANDTFQGLSTCQAVQEQALGDAPARSLLAGQRVTVPLRCACPSAAQAAAGVRYLVTYLVDEFDEVGAIAARFGVDAGNISAANEMAITDTIYPFTTLLIPVKSKPDVSQLRSPPPPPPPPPAAPAPTTNRKNHTGVYVGIGAAAVAVLAVVTAVVAALAVRARRQRRRATAAVAAAGGKGGKGNDKASPAFTGGEVSVSISEAFSGLSDIKSSLKVFTYAELAAATDGFSPDRRVGGSVYRAVFNGDAAA…
Total number sequences	51

## Sheet: Seq LYM
ID	AA number	AA number	Seq
Medtr3g072410	412	MQNKNILLLFLLFKLLITTTSKSTIEPCTTSDTCNSLLGYTLYTDLKVSELSSLFQIDPISLLTANSIDISYPDVEHHILPSKLYLKIPIQCSCIDGIRKSVSTNYKIRPSDTLSSIADSIYGGLVSSDQLREANSVTDPNVLDVGQNLVVPLPCTCFNGSDNGLPAIYMSYVVQPLDSLNNIAARYFTTLTDLMNVNAMGTTGISAGDILAIPIPACASKFPKDSADFGLLVPNGSYAITAGHCVQCSCGPRNLNLYCMPASLAVSCSSMQCKSSNLMLGNVTVQQTSGGCNVTSCTYDGIVNGTIATTLTPSLQPRCPGSQEFPPLIAPPTVVPRESLFAPAPSPSSLFDGTDGRSPKSSVVPSTGFTPALGPSGISSGASAACSLVKPLPTLTLTL…
Medtr4g094730	372	MSGGNKMVTVWLITVAVVLVASVGITVTEAQPEANFKCLTENATCRSLTDYTSTNSTTLKEIATLFGVKHFLDLLGANNLPSNTNNSYKVNPNQVIKVPFPCKCSNRTGTSNHVPRYKIVPGDTLDAIARVRFAGLVKYQQIQTANKIPDANNITAGATIWIPLPCSCDPVDGTSVMHYAHIVPMGSSIQSIAQQYAISQQTLLSLNDLDDPKNLLAGQLLDVPLPVCNSSIKSDSLDFPLLVPNATYFYTAHECVKCKCDSTGDNKNLQCEASNLKPINNWSVCPSLKCSGSVLLGNTTSTDSCSRRVCDYTGYTSSRNISTTLATQNTCAVAPSGSGDSGSGASRSMLNGWVLNKLLILIHFLILFVYLL
Lj0g3v0219829	289	MVGWSLLTSXTDPSVLDVGQSLVVPLPCTCFNGSDNSLPAIYLSYVVQPVDSLAAIAARYLTTLTDLMNVNAMGSTAISDGDILAVPIPACASNFPKSASDFGLLVPNGSYAITAGHCVQCSCGPRNLSLYCMPTSLSASCSSMQCKNSNLMLGNVTAQQSSAGCNVSSCSYDGLVNGTIATRLSASLQPRCPGLQEFPPLVAPPTSVEKDPTFASGPAPSPSPQSHGSGLPSPKSSGMPGLPGFSPANGPVSGISSGASAACSLVKPSPTLTSALVLLLAMLVIPVAL
Lj4g3v0200090	370	MGTVWLSKLVATTMLVAVLGLLAEAQIEAKFKCISENAPCHALADYSHPNGTTLRRIQTLFTVKYLPDILGANNLPANTTRVAPDQVIKVPFPCRCSNGTGLSNKVPRYKIKKGDTLYDIATTVFAGLVKYPQIQVANEIPDANNITAGDTIWIPLPCSCDAVAGSSVVHYAHLVQDGSSVESIAQEYGSTQQILLSLNGISDPKLLQARQLLDVPLQGCSSSVKNDSPDYPLLVPNATYVYTAKECVKCKCDSSNNFRLQCEPSQHKPINDWSVCPSMECSKNVLIGNTTSTDSCNRTICDYAGYSNSKISTILATQNTCAGPPSGSGTSSGSGSGDSGSGASRSNLHGWVWSSPLIVIHFLLFVVFLL
Prupe.1G500000	425	MVNQKPFHKTHIFLSLLVFTNVALLVTSKSTIEPCANSDSCNALLGYTVYTELKVSEVASLFQIDPIALLTANAIDISYPDVENHILPSQLFLKIPIVCSCVDGIRKSVSTHYKTRPSDTLASIADSIYSGLVSADQIREANSISDPSVLDVGQTLVVPLPCTCFNGTDNSLPAIYLSYVVTPVDTLAWIAARYSTTLSDLMNVNAMGSTAIKASDILAIPLPACASNFPRYAADYGLIVPNGSYAITASHCLQCSCGPGNLNLYCQPASLAVSCSSMQCRNSNLMVGNVTVQQSGGGCNVTSCNYGGFVNSSIITTLSTSLQPRCPGAQKFPPLIAPPTSVIRDTTFAPSPAPQSDGAGGTGAPKSSSSVPSTTSMLPGLAPIGGPAGSASGSASDAC…
Prupe.8G176700	364	MAFSFSLSTPTIPTLLFTLSLLLSFLTTPASSATFNCSATTTCQSLIDYVPENTTTLNAIKTLFNISHLRTLLGANNLPLSTAPTQNVTALQKILIPFTCLCSNGTGVSNKRPQYIVKPGDDLDHIATVVFSRLVKYQEIAAVNNIPDPSLIGIGKKLWIPLPCSCDEVNGERVVHYGHVVEAGSSVEAIATKYGTDQETLLRINGIADPKTLQANQVLDVPLKACSSSVSNNSLDAPLLVSNNTYVFTANNCVKCQCSPANNWTLQCEPSTVNSTGCPAMQCQGSSQLFLGNTTTSGCDQTTCTYAGYTNKTNILTTLATQSTCAAPPPDNNNNASRMGLQGSSWSFLFAAIHLALLLLHVLQ
Prupe.5G220900	398	MMRSNQLEQLLVFIFILSPTLLVLVTHAKSTIEACSSSDSCTSLLSYIVPWDSKFSEIAYRFQVNVFDVLAANSINLTIPSPGNQILQAKSLLKIPNSCACVDGIRRSIIAYTVKAADSLDLISQGYGGLVSAEQIRTMNGIGPKNPLTSGQSIMIQLPCTCFNNTNNGVASVYMSYVVQSGESLSSIGLEFGATLMELVSINGLDQPRVDPGDTLAIPFSACSSANLNWYNESLIVPNGSTALTANDCIKCFCRPSSLKLHCSPSGIVGPCSHLQCKESDLFIGDVSIQQNAIGCNVSTCLYRGHNGRKIFRSLENSTHANCSADGEDYSAGSAEQSPNPIVPCISLSPSPLPSAHPPMGVSAYGPSSTHNPNIPNYSTLLTHAPSYSLLVVLFFFL
At1G21880	416	MKIPEKPIFLIFVSLILASSLTFTATAKSTIEPCSSNDTCNALLGYTLYTDLKVSEVASLFQVDPISILLANAIDISYPDVENHILPSKLFLKIPITCSCVDGIRKSVSTHYKTRPSDNLGSIADSVYGGLVSAEQIQEANSVNDPSLLDVGTSLVIPLPCACFNGTDNSLPAVYLSYVVKEIDTLVGIARRYSTTITDLMNVNAMGAPDVSSGDILAVPLSACASKFPRYASDFGLIVPNGSYALAAGHCVQCSCALGSRNLYCEPASLAVSCSSMQCRNSNLMLGNITVQQTSAGCNVTTCDYNGIANGTILTMLTRSLQPRCPGPQQFAPLLAPPDTVPRDVMYAPAPSPDFDGPGSIASSPRSSMLPGGGILPGNPANGPAGSISTASASSVSYF…
At1G77630	423	MKNPEKPLLLFLILASSLASMATAKSTIEPCSSKDTCNSLLGYTLYTDLKVTEVASLFQVDPVSMLLSNSIDISYPDVENHVLPAKLFLKIPITCSCVDGIRKSLSTHYKTRTSDTLGSIADSVYGGLVSPEQIQVANSETDLSVLDVGTKLVIPLPCACFNGTDESLPALYLSYVVRGIDTMAGIAKRFSTSVTDLTNVNAMGAPDINPGDILAVPLLACSSNFPKYATDYGLIIPNGSYALTAGHCVQCSCVLGSRSMYCEPASISVSCSSMRCRNSNFMLGNITSQQSSSGCKLTTCSYNGFASGTILTTLSMSLQPRCPGPQQLAPLIAPPDNVPKELMYLPSPSPSPSPEFDDIAGGGSSIAAVPAASPGGATVSSSNSIPGNPANGPGGSISI…
At2G17120	350	METSCFTLLGLLVSLSFFLTLSAQMTGNFNCSGSTSTCQSLVGYSSKNATTLRNIQTLFAVKNLRSILGANNLPLNTSRDQRVNPNQVVRVPIHCSCSNGTGVSNRDIEYTIKKDDILSFVATEIFGGLVTYEKISEVNKIPDPNKIEIGQKFWIPLPCSCDKLNGEDVVHYAHVVKLGSSLGEIAAQFGTDNTTLAQLNGIIGDSQLLADKPLDVPLKACSSSVRKDSLDAPLLLSNNSYVFTANNCVKCTCDALKNWTLSCQSSSEIKPSNWQTCPPFSQCDGALLNASCRQPRDCVYAGYSNQTIFTTASPACPDSAGPDNYASTLSSSFNFVIVLIQCALLCLCLL
Brara.F01580	414	MRNPENRILFLILASSLLFFTATSKSTIEPCSSNDTCNSLLGYTLYTDLKVSEVASLFQVDPISVLLANAIDISYPDVENHILPSKLFLKIPLTCSCVDGIRKSLSTRYKTRPSDTLGSIADSVYGGLVSAEQIQEASSVSDPSVLDVGTSLVVPLPCACFNGTDNSLPAVYLSYVVRGVDTLAGIARRYSTTVTDLMNVNAMGAPDVSSGDILAVPLSACASNFPKYASDFGLIVPNGSYALAAGHCVQCSCALGSRSLYCEPASLAVSCSSMQCRGSNLMLGNITVQQSSAGCNVTSCDYNGFANGTILTMLSRSLQPRCPGPQQFAPLLAPPDTLPKDIMYAPAPSPDFDGPGSIASSPRSSIIPPGGGSFPGNPANGPAGSISMATASSVSHFFV…
Brara.H02266	414	MKTPDKPIFYLFLILASSSLLFTATAKSTIEPCSSNDTCNSLLGYTLYTDLKVSEVASLFQVDPISILLANAIDISFPDVENHILPSHLFLKIPLTCSCVDGIRKSVSTRYKTRPSDTLASIAGSVYGGLVSAEQIQEANSVTDPSVLDVGTSLLVPLPCACFNGTDNSLPAVYLSYVVKGVDTLAGIARRYETTVTDLMNVNAMGAPDVSSGDILAVPLSACASNFPKYASDYGLIVPNGSYALAAGHCVQCSCALGSRSLYCEPASLAVSCSSMQCTNSNLMLGNITVQQSSAGCNVTTCDYNGFANGTILTMLTRSLQPRCPGPQQFAPLLAPPDTVPKDLMYAPAPSPDYDGPGSIAASPGSSVIPPGGGSLPGNPANGPAGSISTAPTVYSFSY…
Brara.G00290	364	METSRYTLPLLLIAFSFLLTLSAQMTGNFKCGEPGDSPSTCRSLVGYSSKQATTYGNIQTLFAVKKLRSILEANNLPLSTPRAQGVNPNQVVRVPIPCSCSNGTGVSNRSPVYTVKKGDTLFFIASEIFGGLVRYQRISDLNKIPDASEIDVGQRFWIPLPCSCDEVNGQDVVHYAHVVKSGSSLGEIASQFGTDNKTLAQLNGISSDAQLLADYPLNVPLRACNTSLREESLDAKMLLPNSSYSITANNCIRCSCEAANNWTLSCEASQLKPSSTWQTCPSPQCEGAESLFVGNTTNTSCGPRSCAYAGYSNQTIFTALSPDPCSGSGGNSSGPPGNYASTFSSSFSFAMVLIQCALICLCLL
Brara.B02278	422	MKNPEKPILLFLILASTLASTATSKSTIEPCSTSSTCNSFLGYTLYTDLKVTELASLFQADPVSILLSNSISTSYPDVENHVLPSHLFLKIPITCSCVDGIRKSTSTRYKTRTSDTLDSIAGSVYGGLVSPEQIQVANPDIESLDVGTSLVIPLPCACFNGTDESLPAVYLSYVVRGVDTMGGIARRFSTTVADLTNVNAMGAPDINPGDILAVPLLACGSNFPKYATDYGLIIPNGSYALTADHCVQCSCALGSRSMYCEPASLEVSCSSMQCRNSKFMLGNITSQETSAGCKLTTCTYNGFANGTILTTLSRSLQPRCPGPPQLAPLIAPPDTVPKELMFAPSPSPTPSPAPASDGVVSEGPSTVAAAPRGPTVASSSSIPGYPANGPAGSISIASC…
Solyc11g012870	413	MLPFLFLLLSFSFIDPTTSKSTIEPCSNSDTCSSLLGYSLYTDLKVSEVASLFQTDPISLLTTNAIDISYPDVENHILPAKLFLKVPVTCSCVDGIFKSAFVHYKTRPSDTLSLIADIIYGGLVSADQIKEGNPNAVGPDPSVLNVGTNLWIPLPCTCFNGTDNNLPAIYMSYVVRAVDTLAGIAARYSTTLTDLMNVNALGGPSIKEGDILSIPLSACTSSFPRSASDYGLSVANGSYSITASHCVQCSCGPGGRNLYCMPASLAVSCSSMQCKNSNLMLGNVTIQQTGGGCNVTSCNYGGLVNGTIITTLSTSLQPRCPGPQQFPPLVAPPTSLGPDLMFAPAPSPSESGGAPMYRPHTSIVPASGSIIAFPPSGGPSGSTSSACSLNPFVSLLMAV…
Solyc01g112080	345	MVSLSSLFVSILCLLTVSSPAEASFSCTSPGTCDAIIDYTLPNATTFNAVKKLFNVKNLRSLLGVNNLPVNTPADEKLPANQTIKIPFPCLCRNGTGIANKRPIYTVVAGDFLSHIVTDIFAGLFTVEELQRVNNISNPNLIQPGDKLWIPLPCSCDDVDGEKVVHYGRLVSSGNSIEAIAQQYNVSQETLLRLNGLASPRELLAGAVLDVPLKACQSRVSNASLDYPLLVPNDTYIFTAANCVTCKCDAASNWTLQCQPSQIKSSLWKTCPSMQCQGLDNLYIGNVTDCNSTSCAYAGYSNQTIFTTNTQLTCPASDNSAFGMRPGTWIWNVILVAVSSMVIVF
Solyc03g119550	391	MTCKFLVPIYLLILFLVLPKRILPKSVIEPCSASDSCVSYLSYRLPWDSKISEIAFRFRINVSDLLVANSIDSNQPNQILPQKSLVKVPILCSCVDGIRRSVSTRYTIGATDTLMSVSEVYGRLVSAEQIGNANGIDEENTLSSGQSVVIPLPCTCFNNSNNGADSVYMSYVVQSGDELTKIATEYSVTIGNLEIINGLGQNQIDPGDILAIPLAACSSANLNWYNESLIVPKGSYALTANNCIKCGCRPTDLSLDCSPSGIVEKCSHLQCKDSNIFIGERHENHTTSGCNVTACIYRGHLGGKIFRSLVNSTDVKCLGKESEGTESPMESPPSNYIAPYLGPSHYSHSPKNHSLGLLNSSSAHRYTQKSLSQPLHFIILLLFELIFEIFL
Bradi3g57756	433	MEDSLSGGFAAALLVAIAVATVAEAKTTIEPCSGSDACQALLGYTLYADMKVSEVAALFGGVDPAALLAANALDFGAPGAAHRILPMGLFLRVPARCACSDGVRKSVSTRYAARPGDTLAAVADVVFAGLASADQIRDANGLGASGDADPNDAPLDAGQKLVVPLPCVCFNNSDSNLPAVYLSYVVQVGDTVPAVAASYETTVTDIMNVNAMGGPVAAPGDILAIPLPACASTFPKSASDHGLLVANGTYALTAGNCVQCSCGPGNLDLYCTPASLSGSCPSTQCSNSNVLLGNVSTHATSAGCNVSSCGYGGFINGTITTLLNTGLQPKCPGPHQFPVLTDPPRTVNHDSAFLPPLSAPGPAEAGGVFPGPSSSGKGAPSSSVQGGSFKFPRVPPTHG…
Bradi1g76177	362	MALPSPPANLAAPAAVLLLLLFLAGTASAANFTCAAQGSTCQSAIGYVAPNATTYGELLARFNTSTLADLLGANNLPATTPSTARVPAKATVRIPFRCLCAAAGNGASVVGRSDRVPVYTVQPNDWMDAIARNVFDAFVTFQEIADANNIPKPDQIGVGQKLWIPLPCSCDQVLGSDVLHYAHTVAAGETTSGMAAKFGVLESTLVTLNKIADPKNLLQGQILDVPLPVCASSISSTSADHNLLRLPNGAYALTAQDCIQCSCSSNTYQLNCTSTQGKGCPAVPPCNGTLKLGQTNGTGCGSTTCAYSGYSNSSSLSIQTTLVSNQTTACQNSGSERSEFSGSMWMMVAISFHMVLILICFL
Bradi1g46200	397	MSRPAASAAAAALLVILACASAKTTIEPCAGADTCAALLGYTLYADMKVSEVAALFGADPAGLLAANALDFASPGSSNRILPAGLALRVPTRCACSDGVRRSVSVRYAARPADTLASVADVVFSGLASADQIRNANGLAEEDPDAQLDPGQMLVIPFPCICFNSTDNNLPAVYLSYVARVGDTVESIAASHATTVTDLSNVNAMGSPVVAPGDILAIPLPACASTFPNSASDYGLLVANGTYALTAGNCVECSCGPGDLNLYCTPASLTATCSSMQCPNSNLMLGNVTAQSTTSGCSVSSCNYAGLVNGSIATSLSSGLQPTCPGPHQFPPLTGLPTASSHESYLPPSPSPEPAEAGGAVPGSSPGGSNTSPAGGLSRSLLVHQMPLVLSLVLYLHM
Bradi4g37090	373	MAQLTILALLCVSLAALSLSPSPVTAARFACNATAPRASTCQALISYAPPNSTASMTLAGVRALFQLRSHRALLASNNLPLSTPPTAPAPTPLRIRLPCLCSGGAGATFQRPTYRVRAGDTLDAVARSVFAGLVTYRDIAAANNVSDPSKVAVGQELRIPLPCSCDPVDGVPVVHYTYVVPAGSSVAGIAQEYGATEAAILALNRMPDAKSLLAGQVLDVPLRGCSSAISNTAIDRNLIVPNSSYIFTANNCIVCGCSSTTWQLDCQATTGIGPSFCPVAKCGDAFLGNITTSTAPACETTMCSYAGYTNSTSFAIHANLTTTSVCNAAGVSPAAQPSHSSASGLASTARWRWSELIACLHVLLSLCLWVSAP
Os03g04110	356	MASLTAALATPAAAALLLLVLLAAPASAANFTCAVASGTTCKSAILYTSPNATTYGNLVARFNTTTLPDLLGANGLPDGTLSSAPVAANSTVKIPFRCRCNGDVGQSDRLPIYVVQPQDGLDAIARNVFNAFVTYQEIAAANNIPDPNKINVSQTLWIPLPCSCDKEEGSNVMHLAYSVGKGENTSAIAAKYGVTESTLLTRNKIDDPTKLQMGQILDVPLPVCRSSISDTSADHNLMLLPDGTYGFTAGNCIRCSCSSTTYQLNCTAVQNKGCPSVPLCNGTLKLGETNGTGCGSTTCAYSGYSNSSSLIIQTSLATNQTTACQRGGSGRSQFARSMWSMSVISFHMVLIIICFL
Os06g10660	409	MAGWPAAEAAGALVVAILAAAAGGAAGKTTIEPCAGADTCAALLGYTLYADMKVSEVAALFGADPRAVLAANALDFASPGAANRILPAGLPLRVPTRCACSDGVRKSVAVRYSARPADTLASVADVVFAGLASADQIRTANGLSAEDPDAPLDAGATLVVPLPCACFNSTDNNLPAVYLSYVVRVGDTVQSIAATHATTVTDISNVNAMGSPIVAPGDILAIPLPACASMFPNSASDYGLLVANGTYALTAGNCVQCSCGPGDLKLYCTPASLTASCSSMQCPNSNLMLGNVTAQSTSGGCNVSSCSYAGLVNGTIATSLSSGLQPTCPGPHQFPPLRATPIAVNQGSYLAPSPAPGAGEAGGDIPGFPGSSNVSPANGPSGSVSQAASVNRPHQIVAL…
Os09g27890	401	MPPPLLLLLLLAAAAAAVAPARSKSTLESCSSSTACPALLSYTLYADLKLAELAALFSADPLAILAANSIDFAVPDPADRILPAGLPLRVPVPCACSDGIRRVTTVRYVARPGDTLASVASSVYGGLTTPDWISDSNGILGAKPDAAVDAGTTLFVPLHCACFGGVDNGLPAVYLTYVAGKGDTVAAVAQRYRTTATDLMSVNDMATPELAAGDIIVVPLPACTSSFPAFTADYGLAVANGTYAVTANRCVQCSCGPGNLDLFCVPAPLADSTCSSMQCANSSMMLGNFTLLMTSSGCSVTSCSYGGFVNGTILTTLTTALKPQCPGPHQYPPLIPPPTSSFFETYLGPSPTPMASEGGVMAGMAPTSTPAASSGPPPAGRHVVGDVLGAFALCLVGNL…
Os09g37600	373	MTAAMAPPQLVSVLVALLCVAAASPAGVGAARFVCNATAPRASTCQALVAYAPPNATTLAAVRALFQLRSHRALLASNGLPLSTPPSAPAPSPLRVRLPCLCSGGAGATFQRPTYRIRAGDTLDAIARGVFAGLVTYQDIAAANNVSDPNKIAVGQELWIPVPCSCDPVAGQPVVHYTYVVPPGASVAAIAQDFATTEATVLALNRMPDAKSLLAGQVLDVPLRACSSAISSTAIDRNLLVPNGSYILTANNCIMCGCSSYTWQLDCQPTQGISSSFCPASKCGDMFLGNTTTSPTSSCESTACSYAGYTNSTSFTILANLTTSSTCNAAAMSPMAQQAHSSAFRLASTWLRWTELIVCLHVIFLCVSFLNHV
Os02g53000	425	MAGVCGSVAAAAAMVVVVMVSSLPGGVEAKTTIEPCTGSDSCSALLGYTLYADMKVSEVAALFGTDPAALLAANALDFGAPGAAHRILPMGLFVRVPTRCSCTDGVRKSVSVRYAARPADTLATVADGVFAGLAFADQIRNANAVASADPDAPLDPGQKLVVPLPCVCFNSSDNNLPAVYLSYVVQVGDTVPAIAASYETTVTDVMNVNAMGSPIAAPGDILAIPLPACTSAFPKSASDHGLIVANGTYALTAGNCVQCSCGPGNLNLYCTPASLTGSCPSMQCSNSNVLLGNVSARSTSAGCNVSSCSYGGFVNGTITTLLSTGLQSRCPGPHQFPELTEPPTTVNHDSTFLPPLSAPGPAEAGGAIPPPNSGSPSVQGGSFTLPKVSTANGPAGSVS…
Total number sequences	26
